# Supplementary material
Source: publisher figshare collection journal article supplement (https://acs.figshare.com/ndownloader/files/15385502)
Supplement: Supplementary file 1 [file 15385502]

Supporting Information

for

**Coupling of N-Heterocyclic Carbenes to Terminal Alkynes at Half Sandwich  
Cobalt NHC Complexes**

Katharina Lubitz and Udo Radius<sup>\*</sup>

Institut für Anorganische Chemie, Julius-Maximilians-Universität Würzburg, Am Hubland, 97074  
Würzburg, Germany.

Corresponding author E-Mail address:

[u.radius@uni-wuerzburg.de](mailto:u.radius@uni-wuerzburg.de)

## 1) Additional X-ray structures

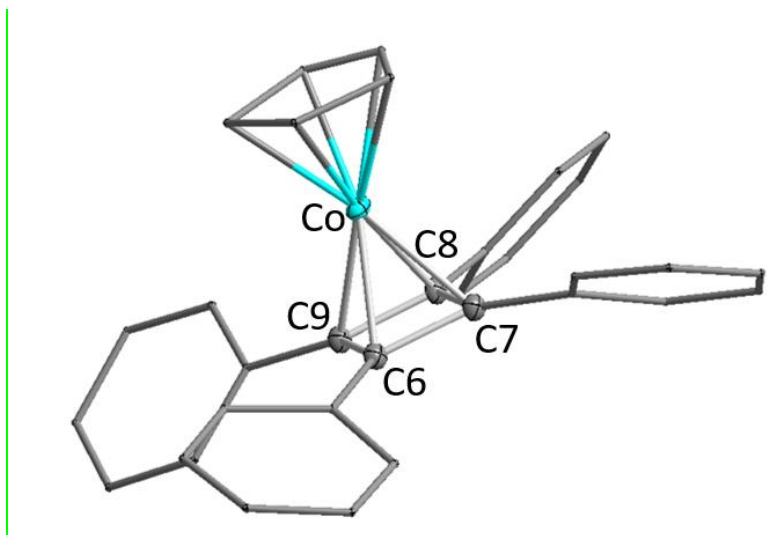

**Figure S1:** Molecular structure of  $[(\eta^5\text{-C}_5\text{H}_5)\text{Co}(\eta^4\text{-C}_4\text{Ph}_4)]$  (**5**) in the solid state (ellipsoids set at the 50 % probability level). Hydrogen atoms have been omitted for clarity. Selected bond length [Å] and angles [°] in **5** Co–C6 1.977(7), Co–C7 1.983(7), Co–C8 1.974(7), Co–C9 1.976(7), Co–( $\eta^4\text{-C}_4\text{Ph}_4$ )<sub>centroid</sub> 1.6852(7), Co–( $\eta^5\text{-C}_5\text{H}_5$ )<sub>centroid</sub> 1.6670(7), C6–C7 1.441(10), C7–C8 1.464(7), C8–C9 1.458(9), C9–C6 1.466(8);  $\eta^5\text{-C}_5\text{H}_5$ )<sub>centroid</sub>–Co–( $\eta^4\text{-C}_4\text{Ph}_4$ )<sub>centroid</sub> 178.652(49), C6–C7–C8 91.2(6), C7–C8–C9 88.9(6), C8–C9–C6 89.4(6), C9–C6–C7 90.(6).

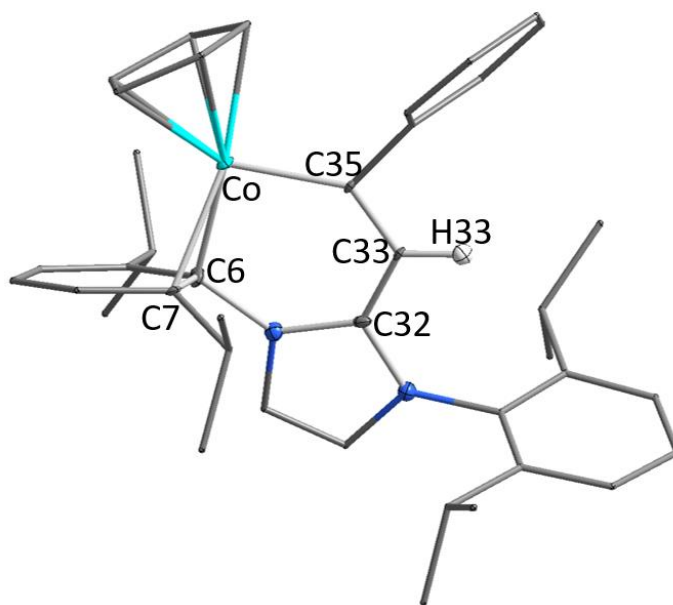

**Figure S2:** Preliminary molecular structure of  $[(\eta^5\text{-C}_5\text{H}_5)\text{Co}(-\text{C}(\text{Ph})=\text{C}(\text{H})\{\text{Dipp}_2\text{Im}\})]$  (**6**) in the solid state.

## 2) NMR/IR/UV-Vis Spectra of Complexes (2-9)

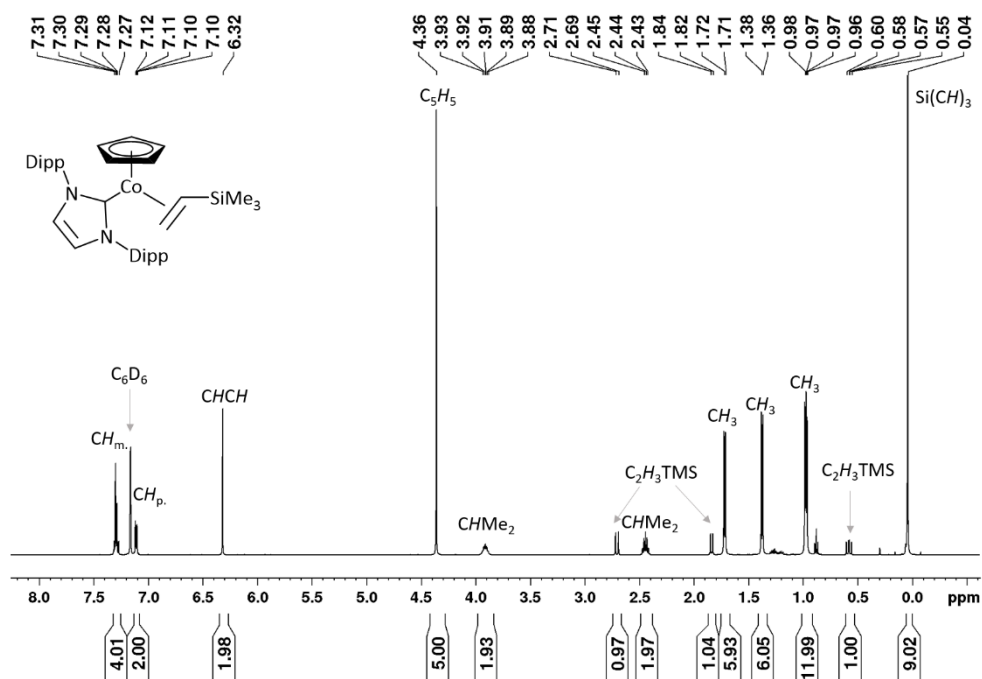

Figure S3: <sup>1</sup>H NMR spectrum of  $[(\eta^5\text{-C}_5\text{H}_5)\text{Co}(\text{Dipp}_2\text{Im})(\eta^2\text{-C}_2\text{H}_3\text{SiMe}_3)]$  (**2**) in C<sub>6</sub>D<sub>6</sub>.

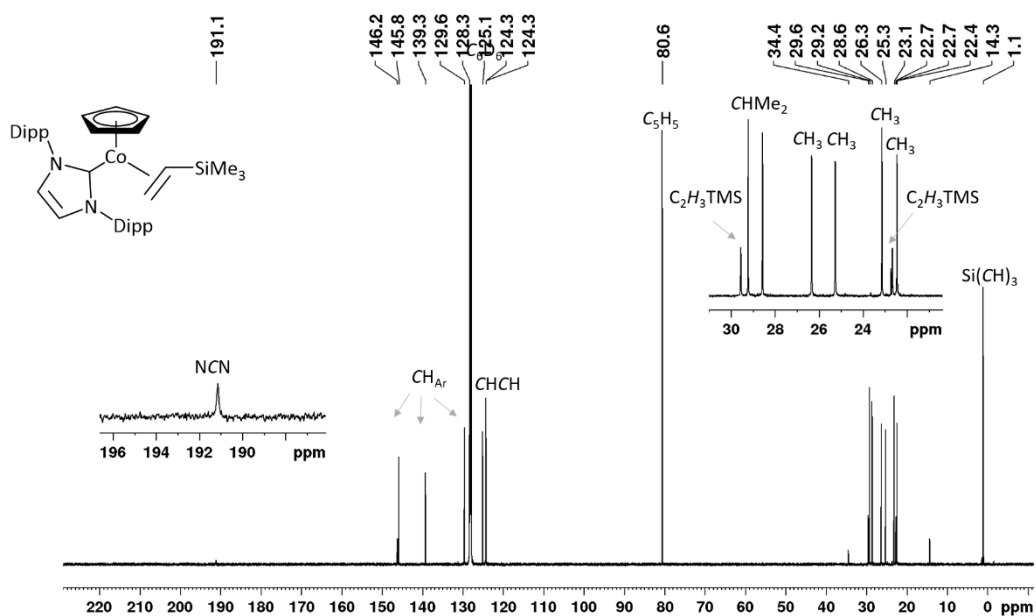

Figure S4: <sup>13</sup>C{<sup>1</sup>H} NMR spectrum of  $[(\eta^5\text{-C}_5\text{H}_5)\text{Co}(\text{Dipp}_2\text{Im})(\eta^2\text{-C}_2\text{H}_3\text{SiMe}_3)]$  (**2**) in C<sub>6</sub>D<sub>6</sub>.

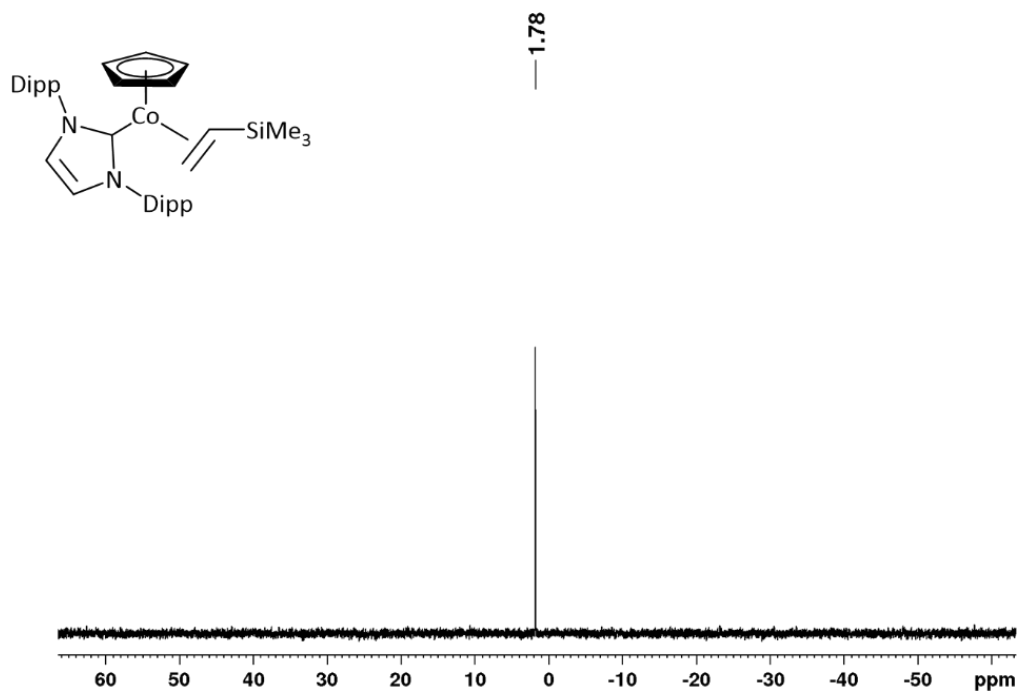

**Figure S5:**  $^{29}\text{Si}$  NMR spectrum of  $[(\eta^5\text{-C}_5\text{H}_5)\text{Co}(\text{Dipp}_2\text{Im})(\eta^2\text{-C}_2\text{H}_3\text{SiMe}_3)]$  (**2**) in  $\text{C}_6\text{D}_6$ .

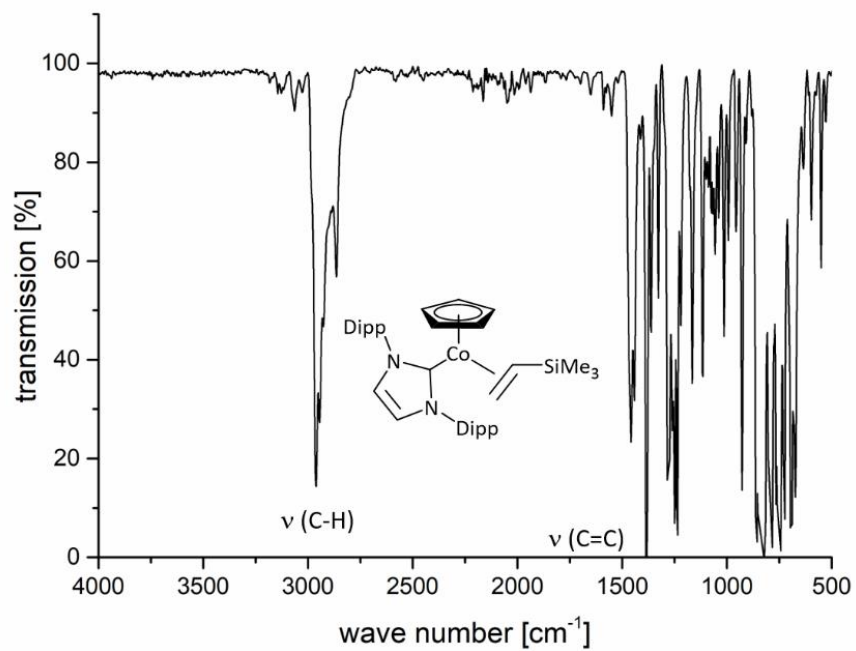

**Figure S6:** IR spectrum of  $[(\eta^5\text{-C}_5\text{H}_5)\text{Co}(\text{Dipp}_2\text{Im})(\eta^2\text{-C}_2\text{H}_3\text{SiMe}_3)]$  (**2**).

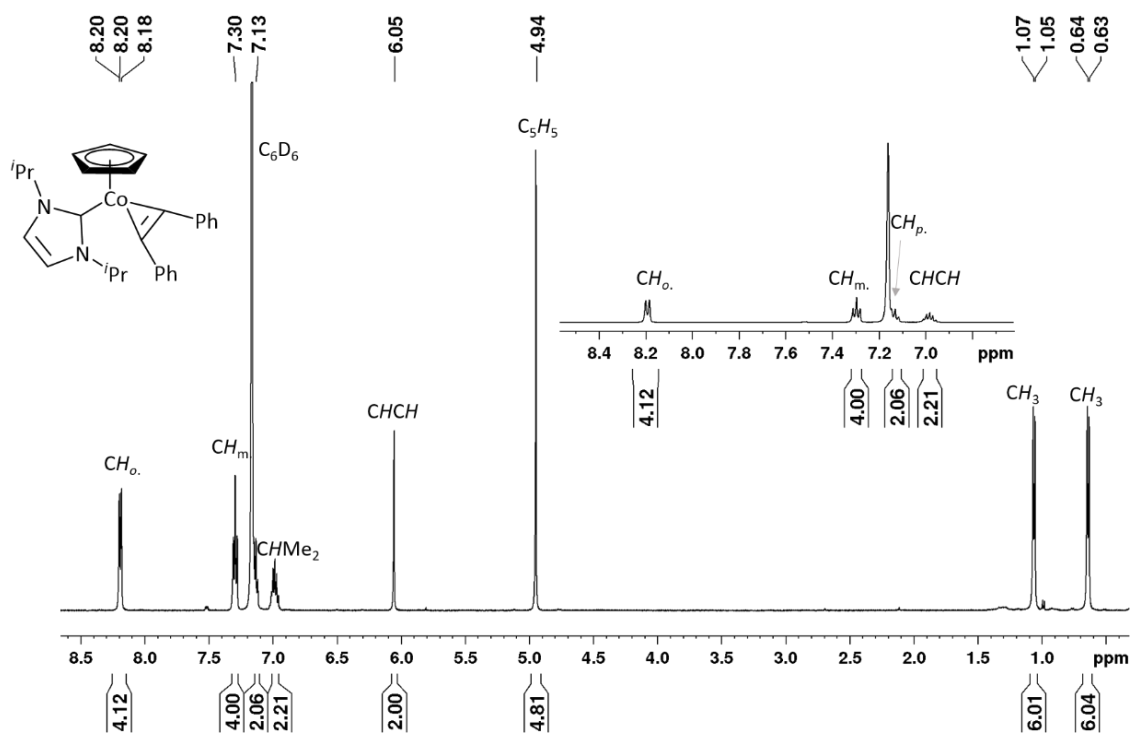

**Figure S7:**  $^1\text{H}$  NMR spectrum of  $[(\eta^5\text{-C}_5\text{H}_5)\text{Co}(\text{iPr}_2\text{Im})(\eta^2\text{-C}_2\text{Ph}_2)]$  (**3**) in  $\text{C}_6\text{D}_6$ .

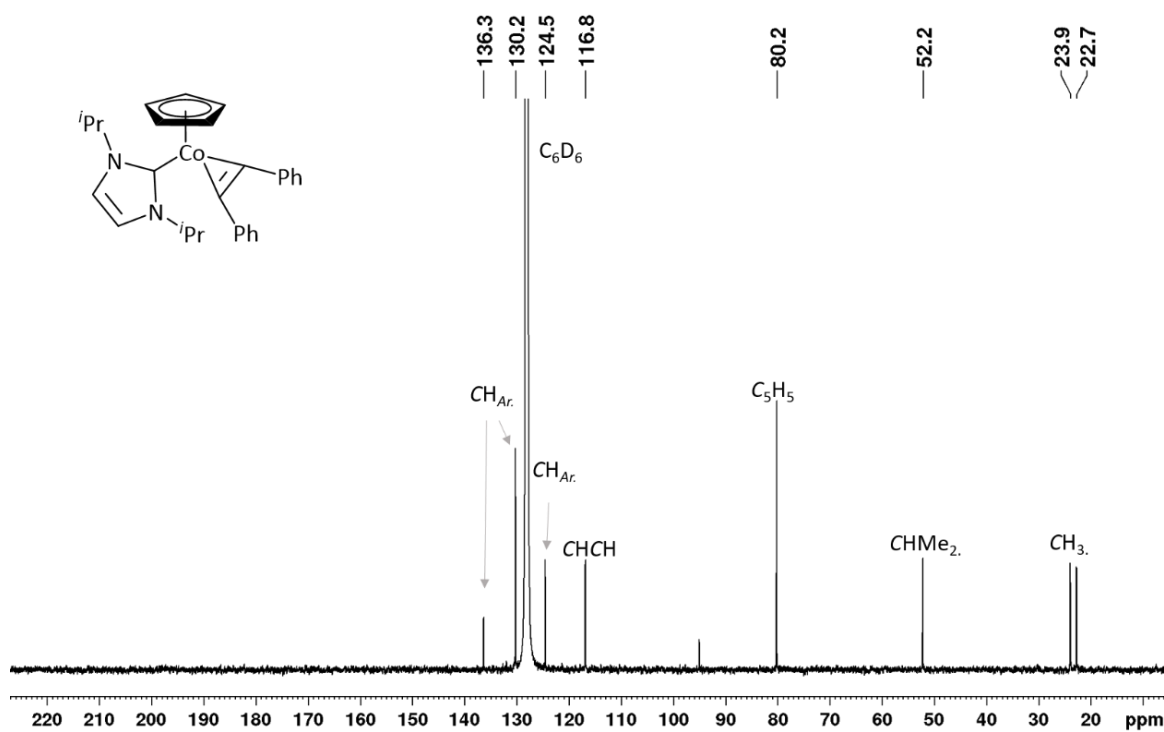

**Figure S8:**  $^{13}\text{C}\{^1\text{H}\}$  NMR spectrum of  $[(\eta^5\text{-C}_5\text{H}_5)\text{Co}(\text{iPr}_2\text{Im})(\eta^2\text{-C}_2\text{Ph}_2)]$  (**3**) in  $\text{C}_6\text{D}_6$ . The resonances of the carbene carbon atom (183.0 ppm) and the alkyne carbon atoms (129.4 ppm) have been identified in a  $^{13}\text{C}\{^1\text{H}\}$  HMBC experiment.

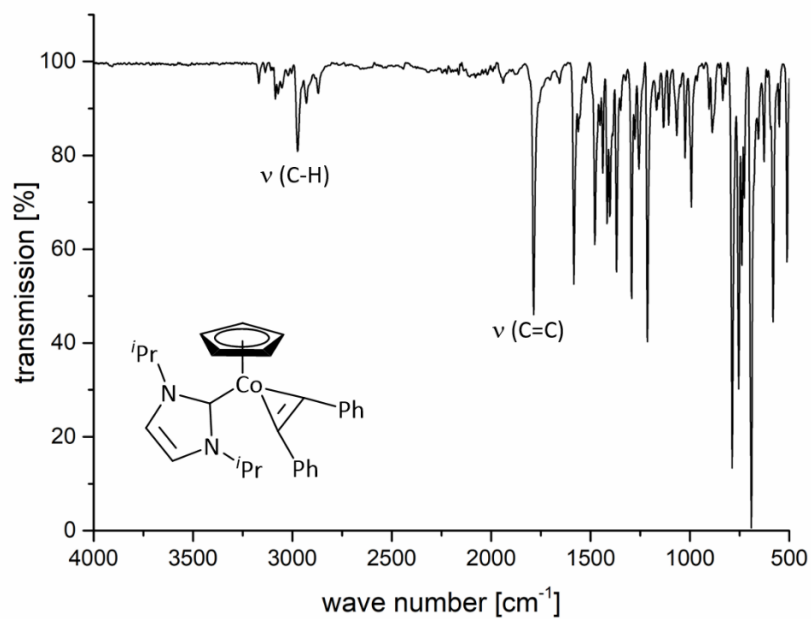

**Figure S9:** IR spectrum of  $[(\eta^5\text{-C}_5\text{H}_5)\text{Co}(\text{iPr}_2\text{Im})(\eta^2\text{-C}_2\text{Ph}_2)]$  (**3**).

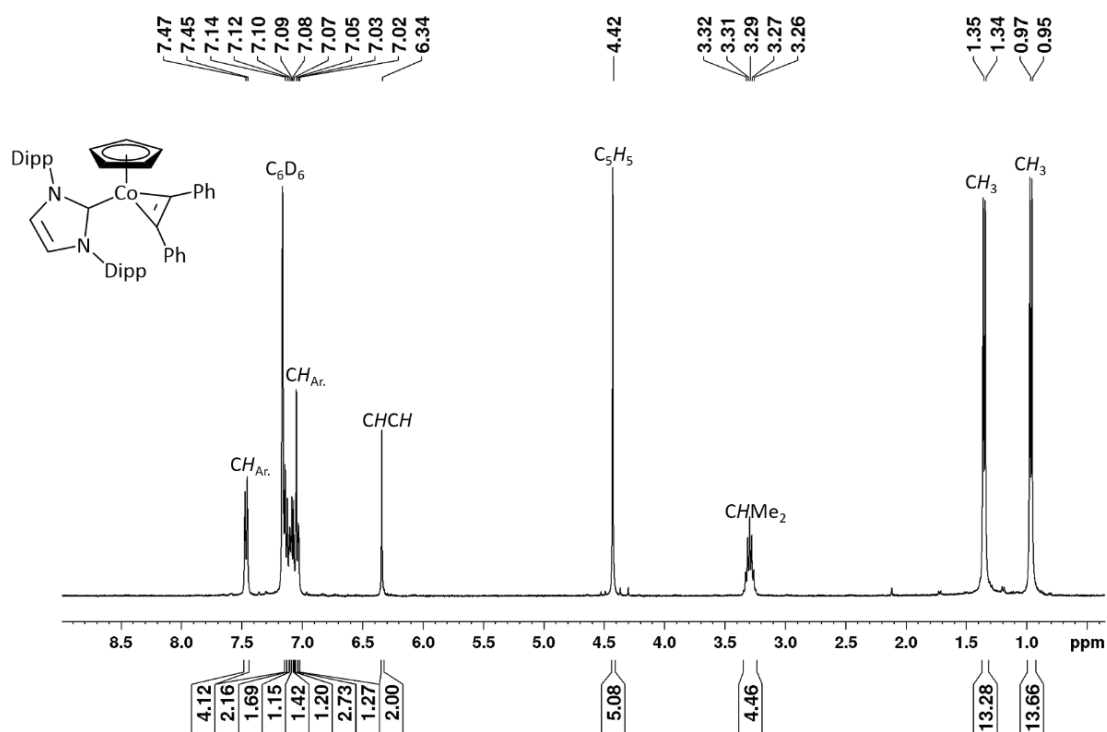

**Figure S10:**  $^1\text{H}$  NMR spectrum of  $[(\eta^5\text{-C}_5\text{H}_5)\text{Co}(\text{Dipp}_2\text{Im})(\eta^2\text{-C}_2\text{Ph}_2)]$  (**4**) in  $\text{C}_6\text{D}_6$ .

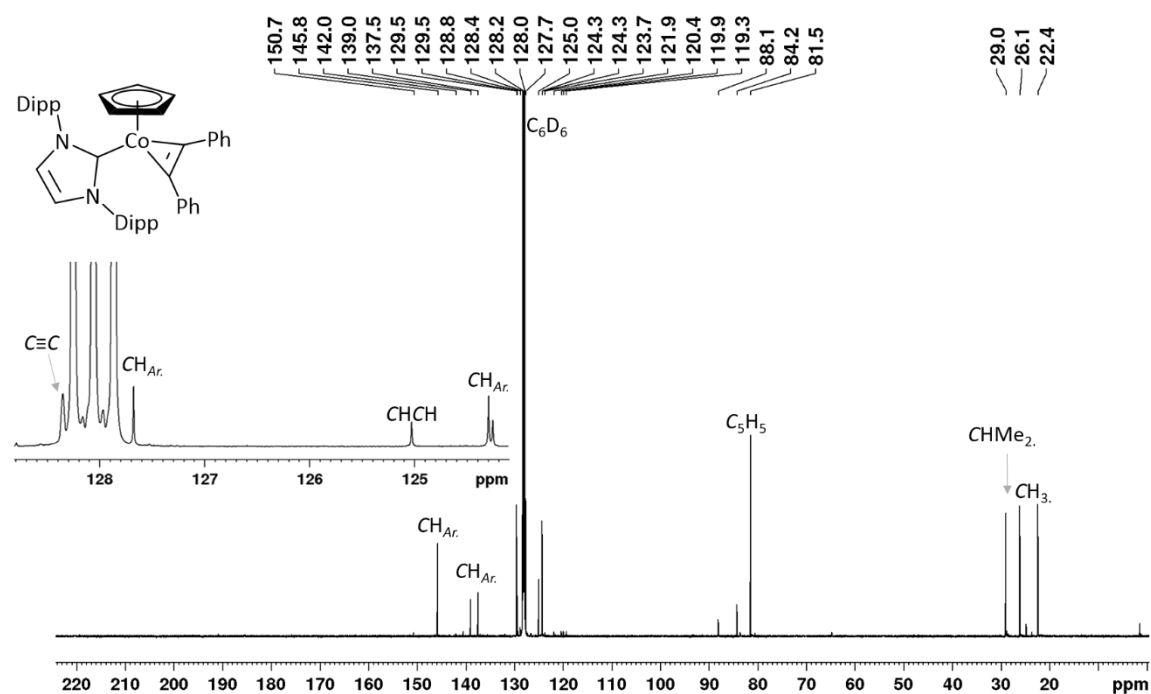

**Figure S11:**  $^{13}\text{C}\{^1\text{H}\}$  NMR spectrum of  $[(\eta^5\text{-C}_5\text{H}_5)\text{Co}(\text{Dipp}_2\text{Im})(\eta^2\text{-C}_2\text{Ph}_2)]$  (**4**) in  $\text{C}_6\text{D}_6$ . The resonance of the carbene carbon atom have been identified in a  $^{13}\text{C}\{^1\text{H}\}$  HMBC experiment at 196.6 ppm.

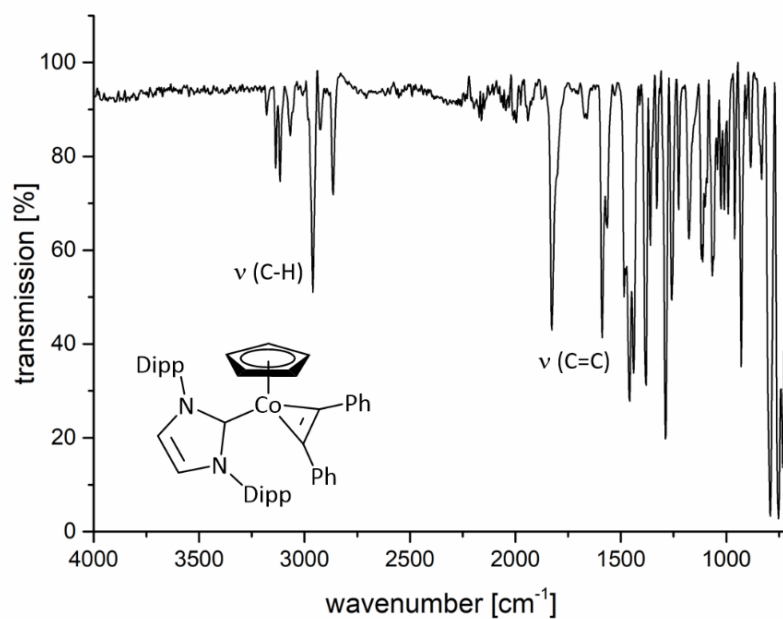

**Figure S12:** IR spectrum of  $[(\eta^5\text{-C}_5\text{H}_5)\text{Co}(\text{Dipp}_2\text{Im})(\eta^2\text{-C}_2\text{Ph}_2)]$  (**4**).

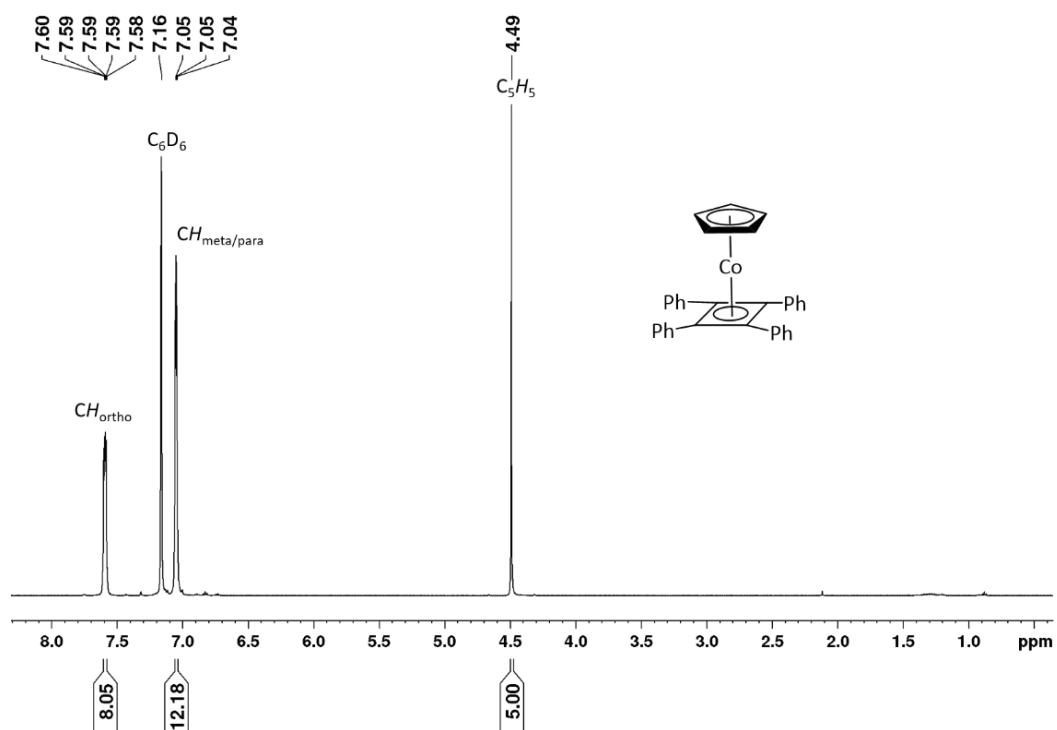

**Figure S13:**  $^1\text{H}$  NMR spectrum of  $[(\eta^5\text{-C}_5\text{H}_5)\text{Co}(\eta^4\text{-C}_4\text{Ph}_4)]$  (**5**) in  $\text{C}_6\text{D}_6$ .

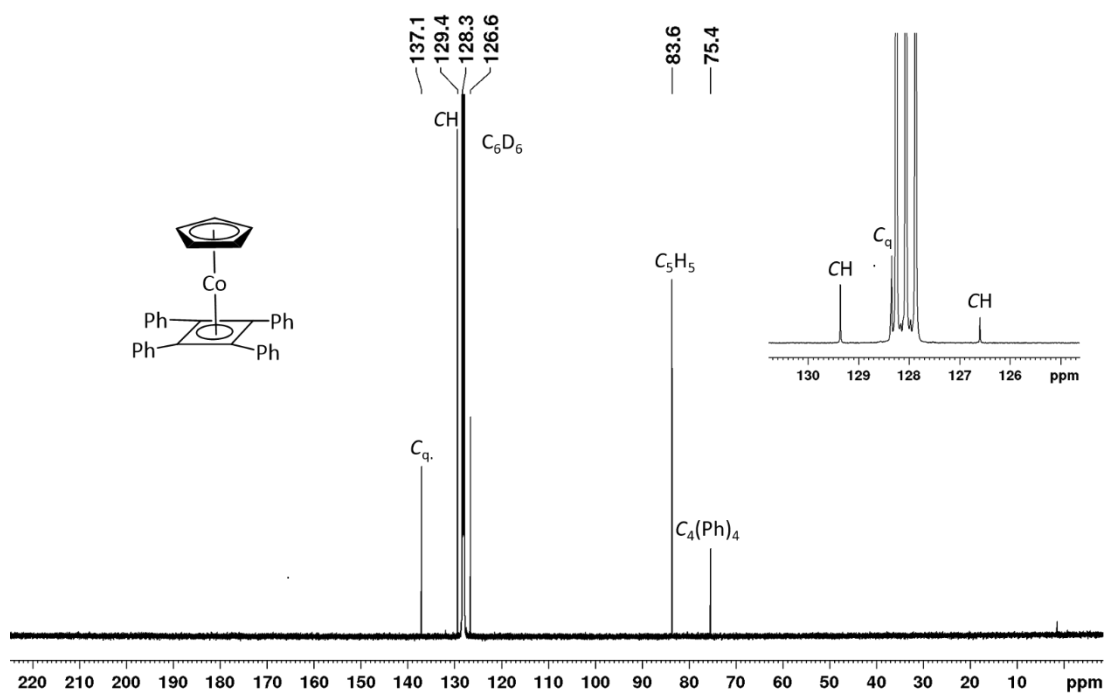

**Figure S14:**  $^{13}\text{C}\{^1\text{H}\}$  NMR spectrum of  $[(\eta^5\text{-C}_5\text{H}_5)\text{Co}(\eta^4\text{-C}_4\text{Ph}_4)]$  (**5**) in  $\text{C}_6\text{D}_6$ .



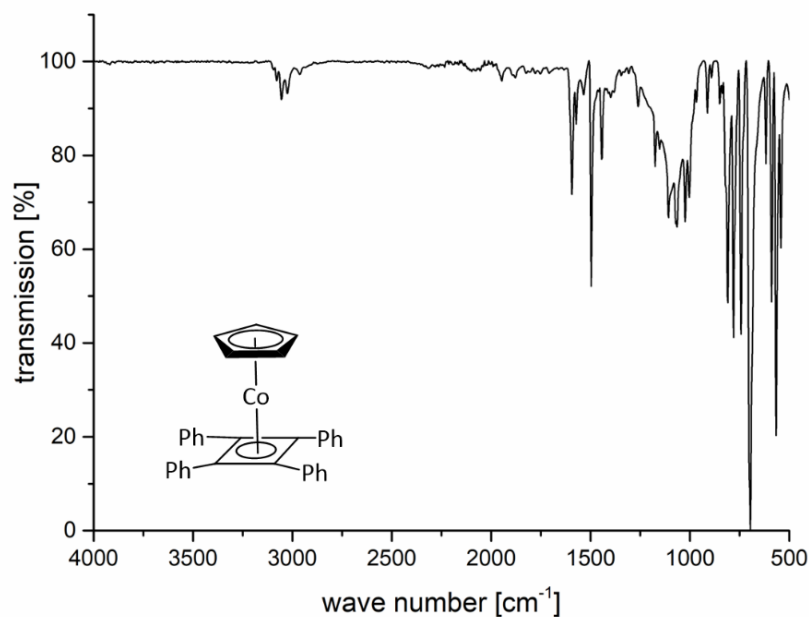

**Figure S15:** IR spectrum of  $[(\eta^5\text{-C}_5\text{H}_5)\text{Co}(\eta^4\text{-C}_4\text{Ph}_4)]$  (**5**).

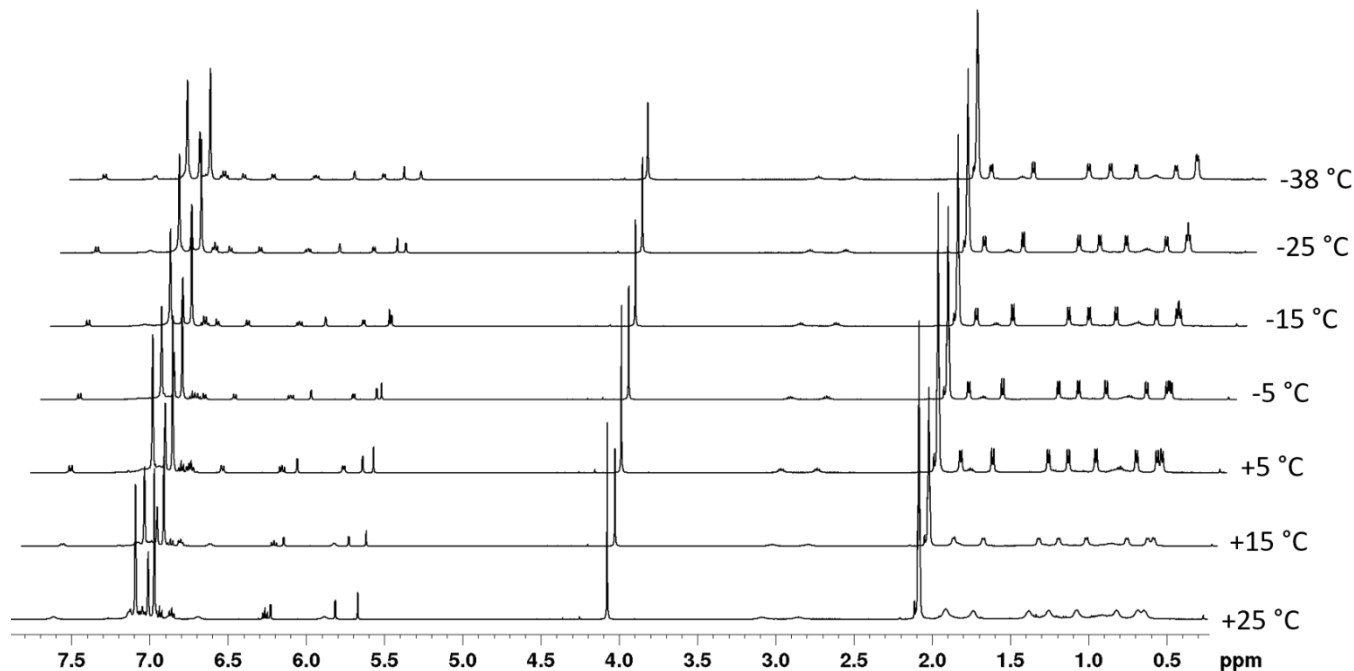

**Figure S16:**  $^1\text{H}$  NMR spectra of  $[(\eta^5\text{-C}_5\text{H}_5)\text{Co}(-\text{C}(\text{Ph})=\text{C}(\text{H})\{\text{Dipp}_2\text{Im}\})]$  (**6**) at different temperatures in  $d^8$  toluene. The resonances of the methyl and methine protons of the Dipp *iso*-propyl groups are broadened at room temperature, presumably due to on/off coordination of one of the aryl ring  $\pi$ -system at the Co atom (see drawing below), associated with dynamics of the NHC unit of the complex. At temperatures below  $+10^\circ\text{C}$  the resonances became sharp.

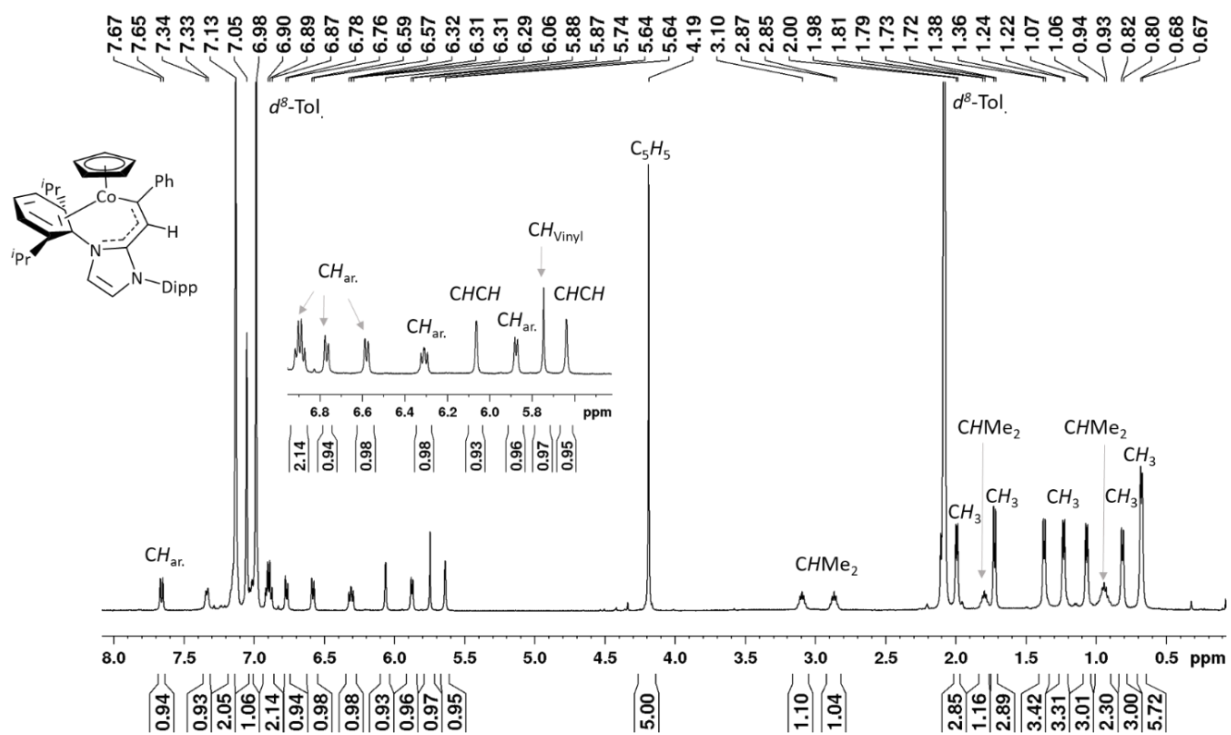

**Figure S17:**  $^1\text{H}$  NMR spectrum of  $[(\eta^5\text{-C}_5\text{H}_5)\text{Co}(-\text{C}(\text{Ph})=\text{C}(\text{H})\{\text{Dipp}_2\text{Im}\})]$  (**6**) at  $-38^\circ\text{C}$  in  $d^8$  toluene.

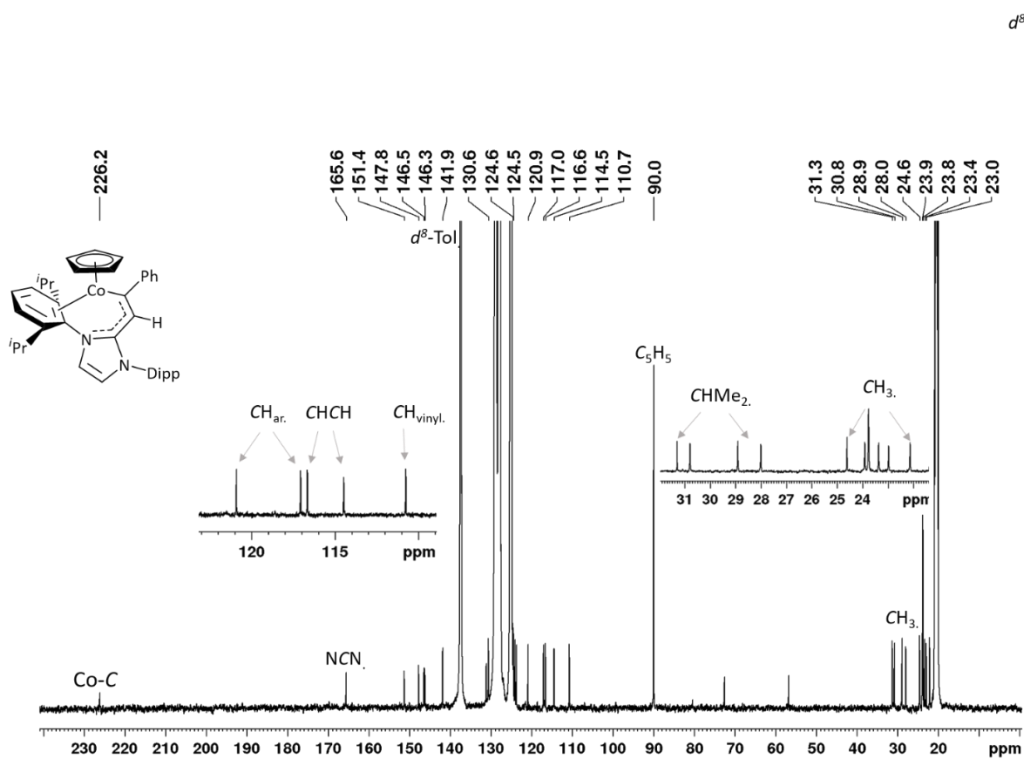

**Figure S18:**  $^{13}\text{C}\{^1\text{H}\}$  NMR spectrum of  $[(\eta^5\text{-C}_5\text{H}_5)\text{Co}(-\text{C}(\text{Ph})=\text{C}(\text{H})\{\text{Dipp}_2\text{Im}\})]$  (**6**) at  $-38^\circ\text{C}$  in  $d^8$  toluene.

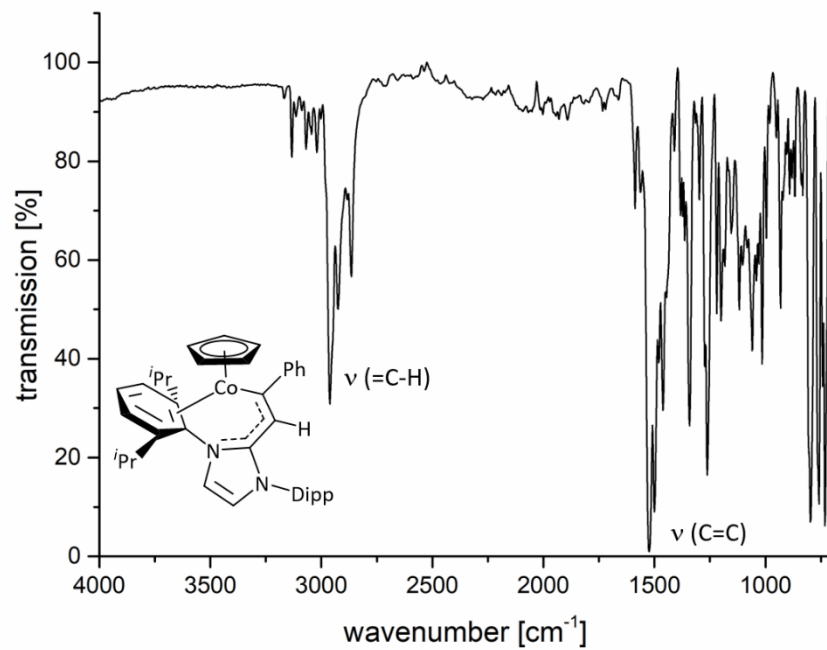

**Figure S19:** IR spectrum of  $[(\eta^5\text{-C}_5\text{H}_5)\text{Co}(-\text{C}(\text{Ph})=\text{C}(\text{H})\{\text{Dipp}_2\text{Im}\})]$  (**6**).

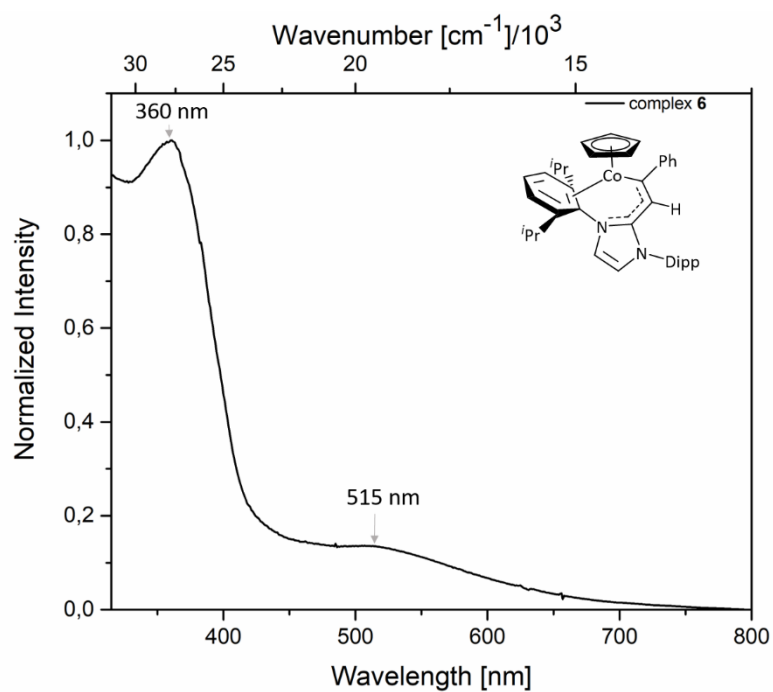

**Figure S20:** UV-Vis spectrum of  $[(\eta^5\text{-C}_5\text{H}_5)\text{Co}(-\text{C}(\text{Ph})=\text{C}(\text{H})\{\text{Dipp}_2\text{Im}\})]$  (**6**).

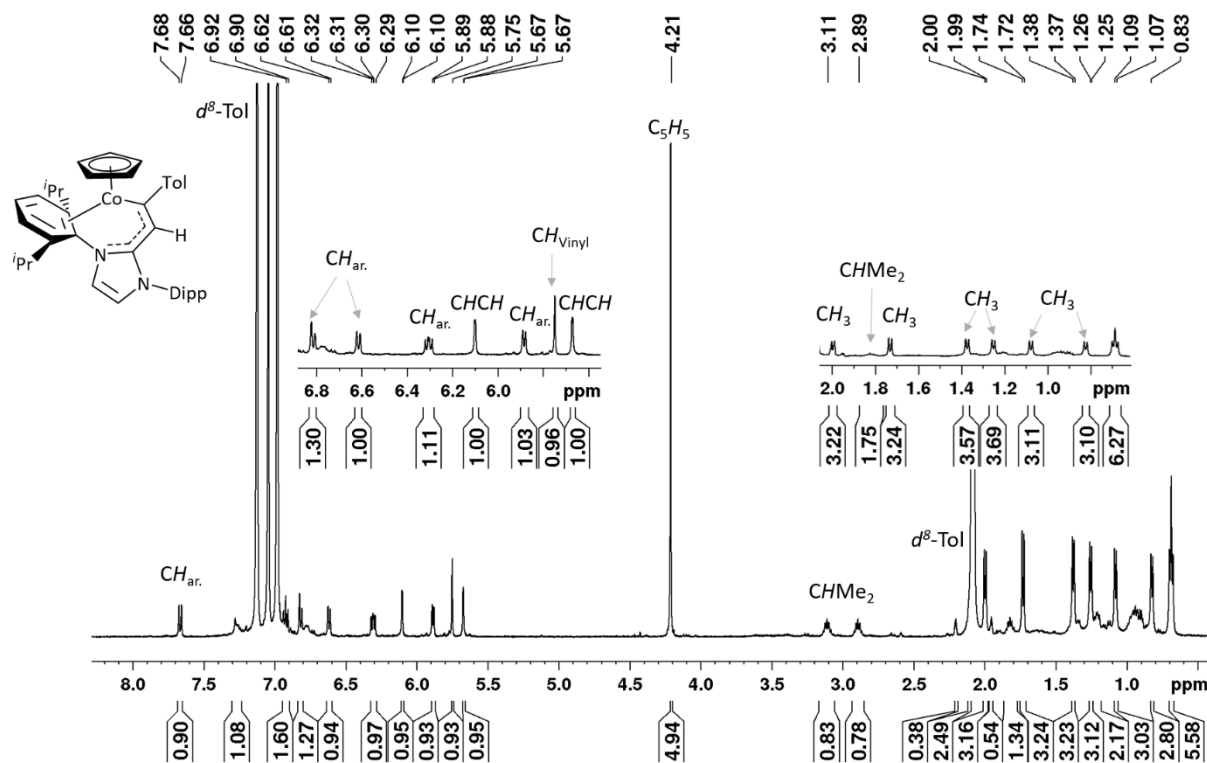

**Figure S21:** <sup>1</sup>H NMR spectrum of  $[(\eta^5\text{-C}_5\text{H}_5)\text{Co}(-\text{C}(\text{Tol})=\text{C}(\text{H})\{\text{Dipp}_2\text{Im}\})]$  (**7**) at -38 °C in *d*<sup>8</sup> toluene.

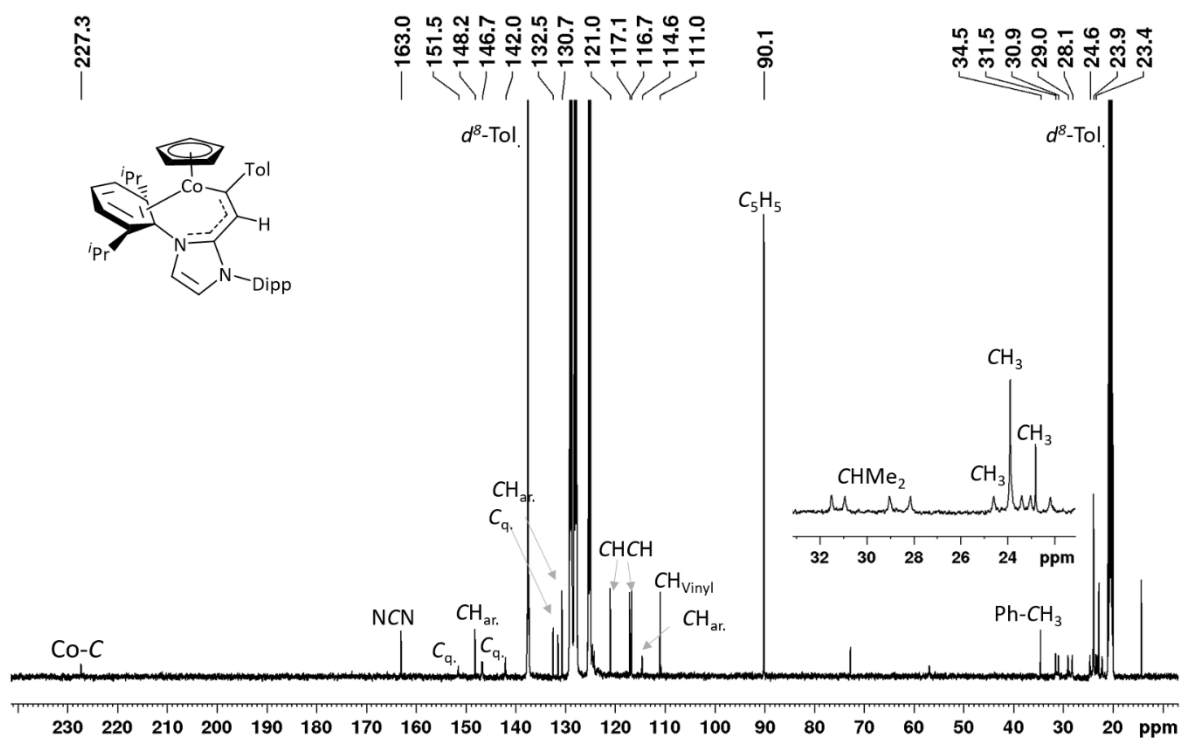

**Figure S22:** <sup>13</sup>C{<sup>1</sup>H} NMR spectrum of  $[(\eta^5\text{-C}_5\text{H}_5)\text{Co}(-\text{C}(\text{Tol})=\text{C}(\text{H})\{\text{Dipp}_2\text{Im}\})]$  (**7**) at +25 °C in *d*<sup>8</sup> toluene.

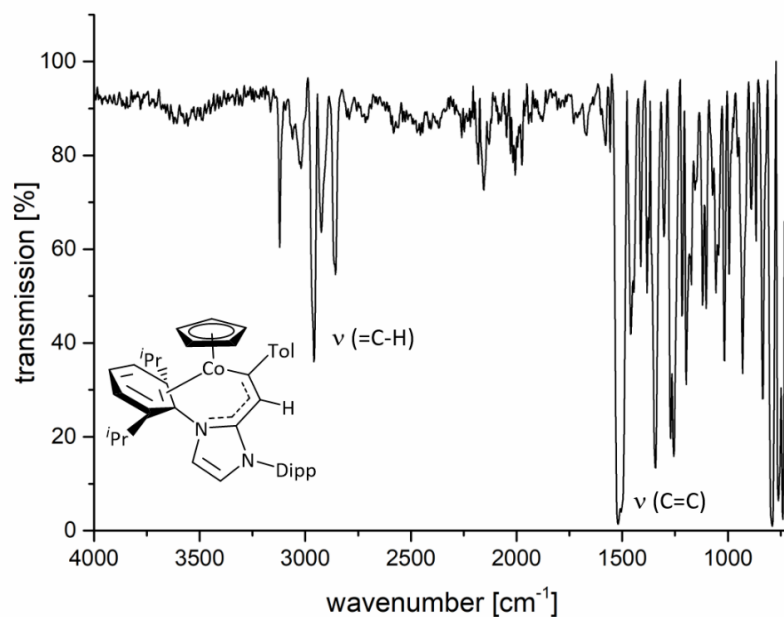

**Figure S23:** IR spectrum of  $[(\eta^5\text{-C}_5\text{H}_5)\text{Co}(-\text{C}(\text{Tol})=\text{C}(\text{H})\{\text{Dipp}_2\text{Im}\})]$  (**7**).

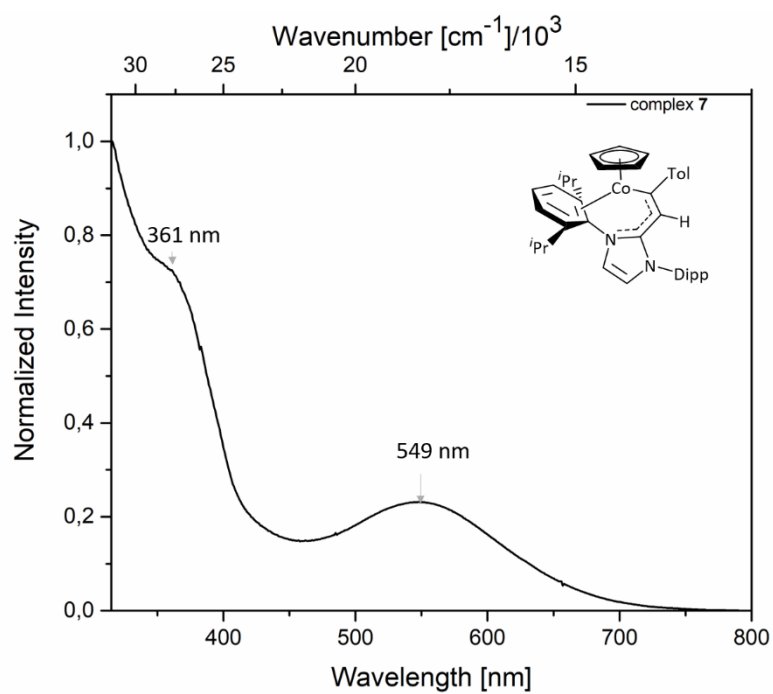

**Figure S24:** UV-Vis spectrum of  $[(\eta^5\text{-C}_5\text{H}_5)\text{Co}(-\text{C}(\text{Tol})=\text{C}(\text{H})\{\text{Dipp}_2\text{Im}\})]$  (**7**).

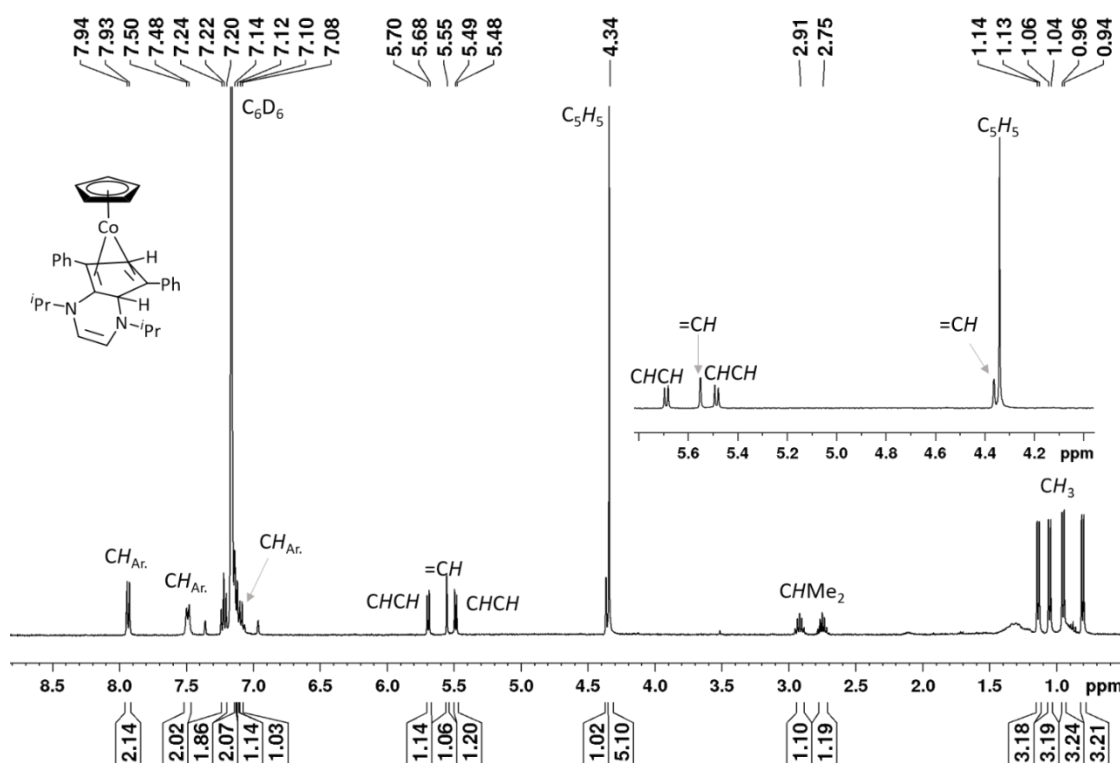

Figure S25: <sup>1</sup>H NMR spectrum of [(η<sup>5</sup>-C<sub>5</sub>H<sub>5</sub>)Co(η<sup>4</sup>{(RER-NHC)<sub>4</sub>H<sub>2</sub>Ph<sub>2</sub>})] (**8**) in C<sub>6</sub>D<sub>6</sub>.

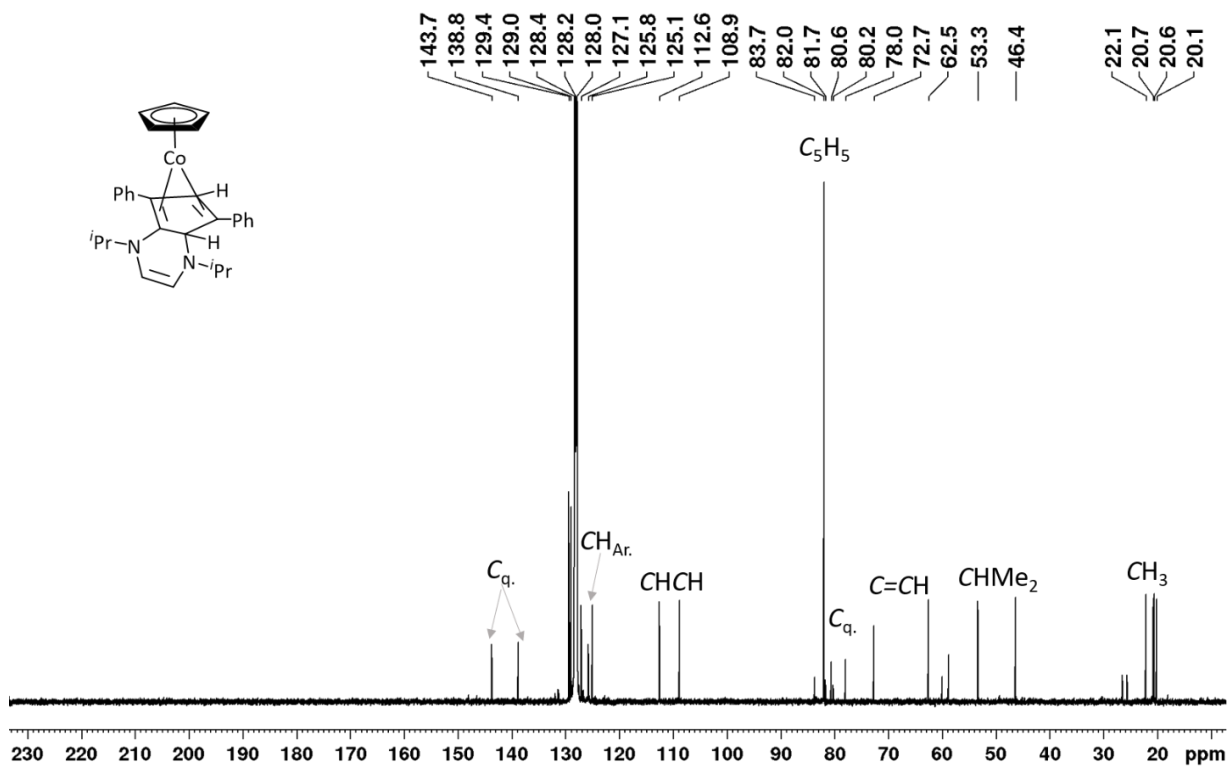

Figure S26: <sup>13</sup>C{<sup>1</sup>H} NMR spectrum of [(η<sup>5</sup>-C<sub>5</sub>H<sub>5</sub>)Co(η<sup>4</sup>{(RER-NHC)<sub>4</sub>H<sub>2</sub>Ph<sub>2</sub>})] (**8**) in C<sub>6</sub>D<sub>6</sub>.

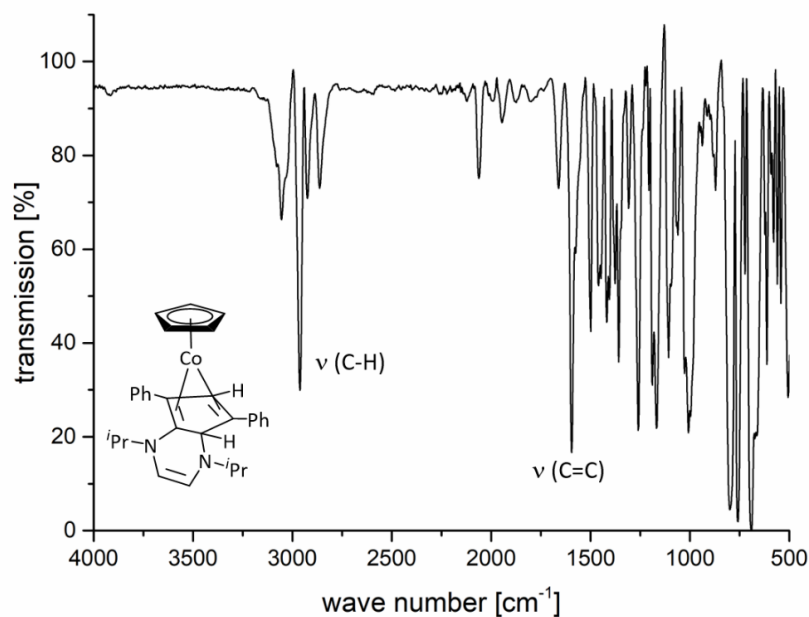

**Figure 27:** IR spectrum of  $[(\eta^5\text{-C}_5\text{H}_5)\text{Co}(\eta^4\{(\text{RER-NHC})\text{C}_4\text{H}_2\text{Ph}_2\})]$  (**8**).

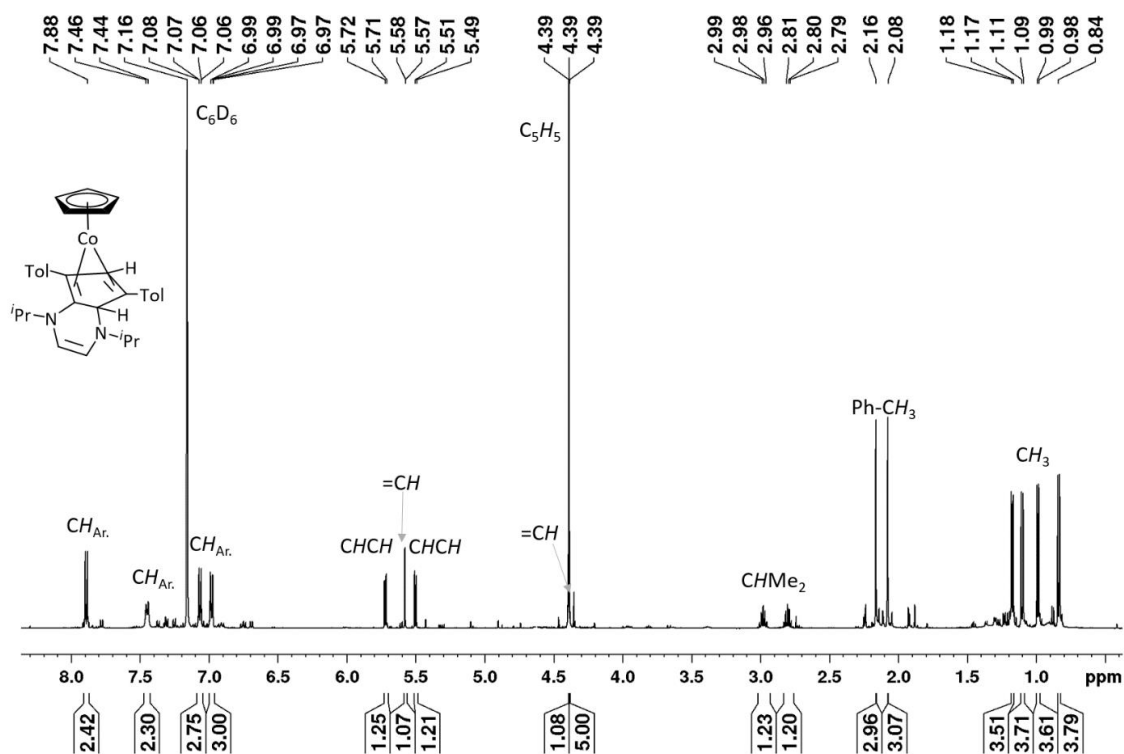

**Figure S28:**  $^1\text{H}$  NMR spectrum of  $[(\eta^5\text{-C}_5\text{H}_5)\text{Co}(\eta^4\{(\text{RER-NHC})\text{C}_4\text{H}_2\text{Tol}_2\})]$  (**9**) in  $\text{C}_6\text{D}_6$ .

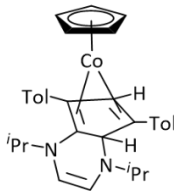

S16



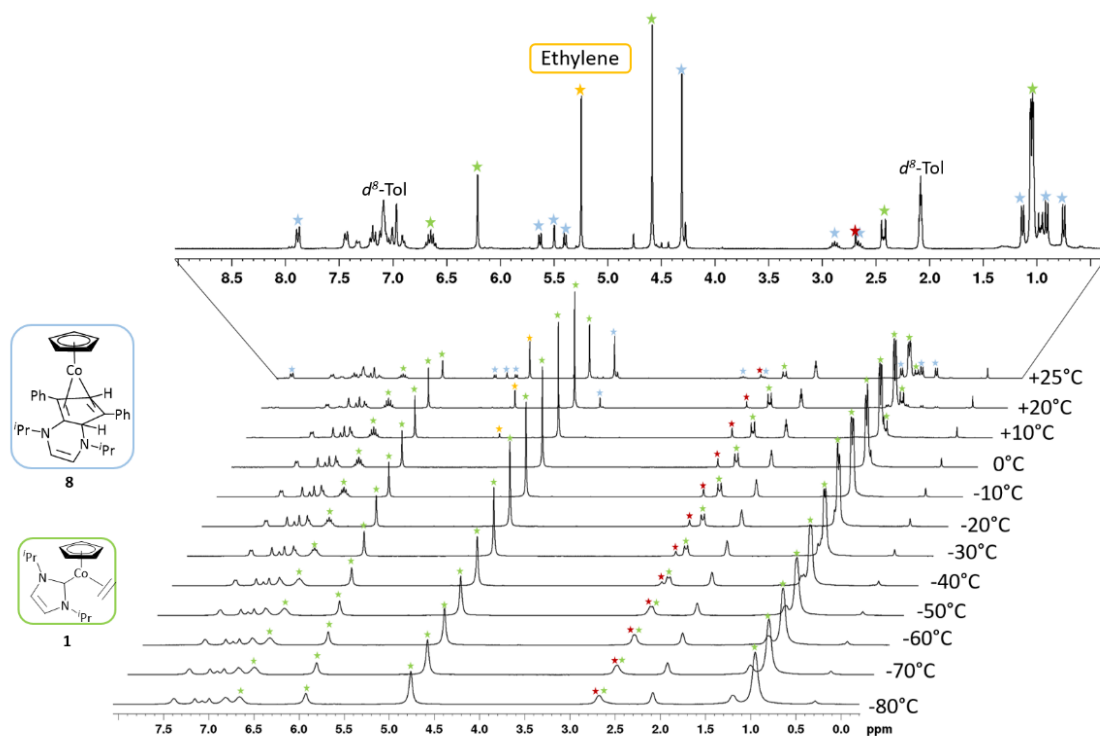

**Figure S31:**  $^1\text{H}$  NMR spectra of the reaction of  $[(\eta^5\text{-C}_5\text{H}_5)\text{Co}(\text{iPr}_2\text{Im})(\eta^2\text{-C}_2\text{H}_4)]$  **1** (green) with one equivalent phenylacetylene (red) in  $d^8$ -toluene at different temperatures starting at  $-80^\circ\text{C}$ . This reaction leads directly  $[(\eta^5\text{-C}_5\text{H}_5)\text{Co}(\eta^4\{(\text{RER-NHC})\text{C}_4\text{H}_2\text{Ph}_2\})]$  (**8**) (blue) (and **1**) at  $20^\circ\text{C}$ . After the reaction has been completed, the NMR spectrum at top reveals a reaction mixture of **1** and **8** in a ratio round 1:1, as well as free ethylene (yellow). No resonances for any intermediate was detected.

### 3) NMR spectra of the experiments concerning the catalytic alkyne trimerization

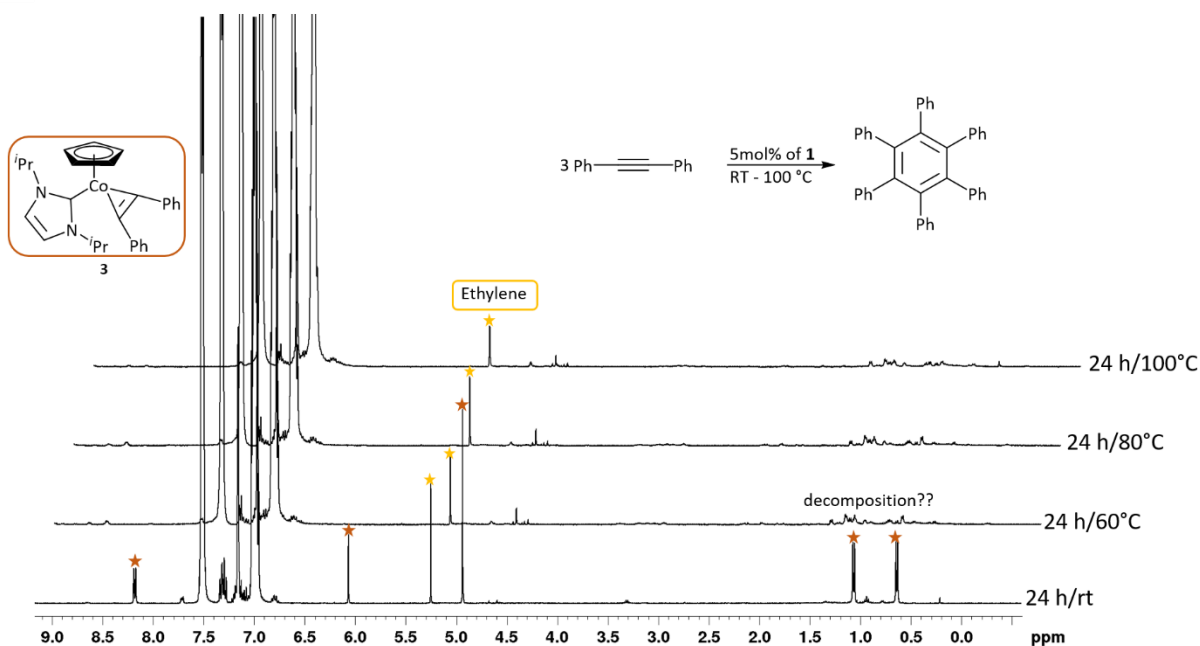

**Figure S32:**  $^1\text{H}$  NMR spectra of the reaction of diphenylacetylene with catalytic amounts of  $[(\eta^5\text{-C}_5\text{H}_5)\text{Co}(\text{iPr}_2\text{Im})(\eta^2\text{-C}_2\text{H}_4)]$  **1** (5mol%) in  $\text{C}_6\text{D}_6$  at different temperatures. The NMR spectrum at room temperature reveals the resonances found for complex **3** (brown) and a singlet of free ethylene (yellow), eliminated from starting compound **1**. At higher temperatures complex **3** decomposes. All spectra reveal major amounts of diphenylacetylene and no [2+2+2] cycloaddition product of diphenylacetylene was formed.

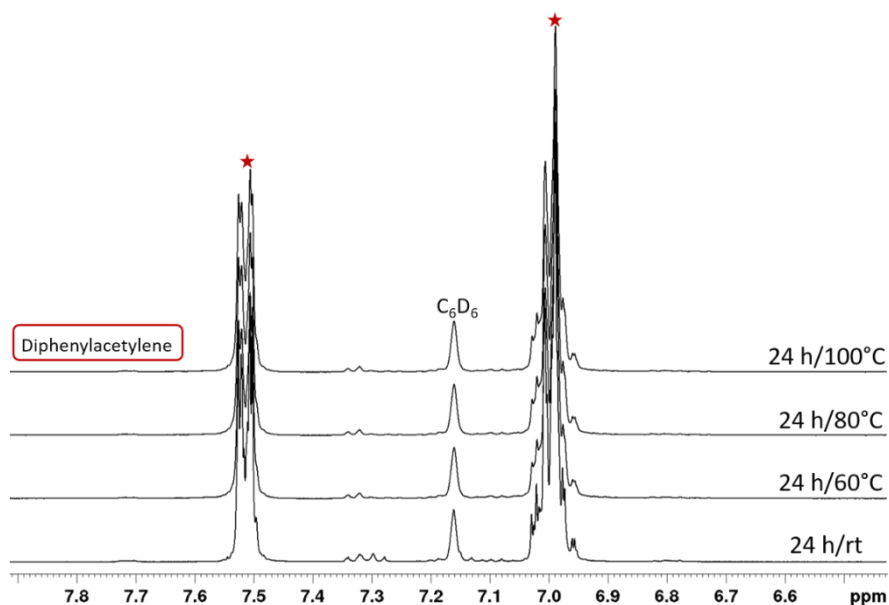

**Figure S33:**  $^1\text{H}$  NMR spectra of the reaction of diphenylacetylene with catalytic amounts of  $[(\eta^5\text{-C}_5\text{H}_5)\text{Co}(\text{iPr}_2\text{Im})(\eta^2\text{-C}_2\text{H}_4)]$  **1** (5mol%) in  $\text{C}_6\text{D}_6$  at different temperatures, depicted is the aromatic region of the  $^1\text{H}$  NMR spectra. Only the resonances of diphenylacetylene (red) were detected, even at high temperatures (100 °C). This result has been confirmed by  $^{13}\text{C}\{^1\text{H}\}$  NMR spectroscopy and GC/MS analyses; the latter indicates only traces of hexaphenylbenzene (534.23), beside a major amount of diphenylacetylene (278.2).

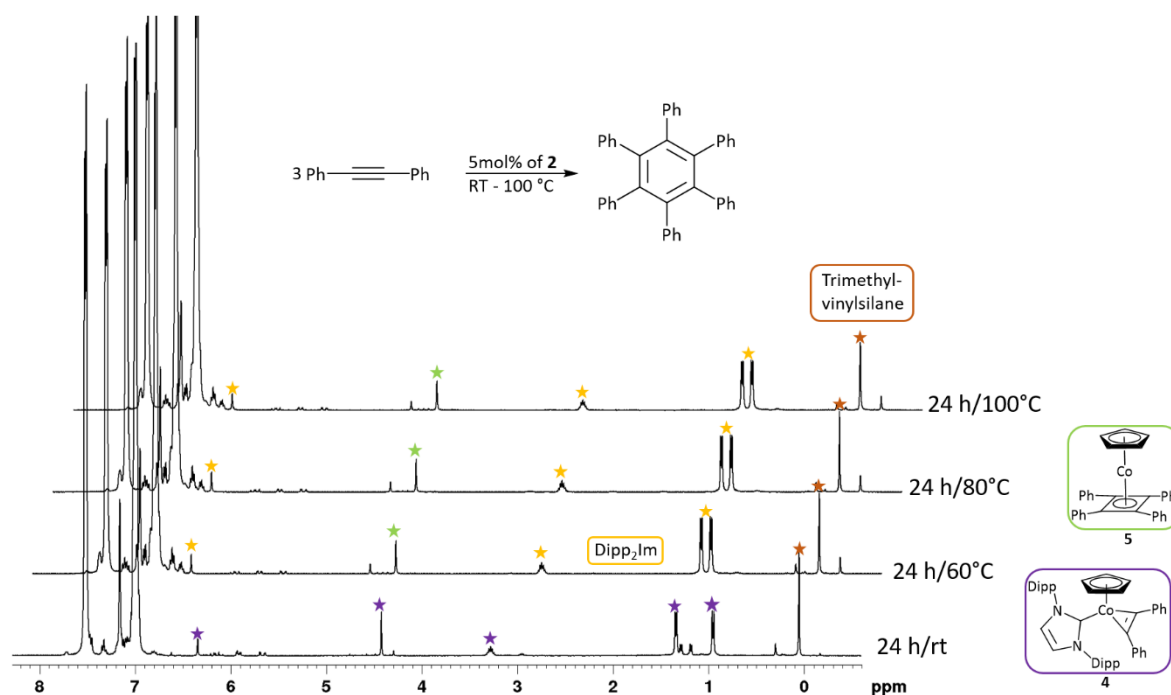

**Figure S34:**  $^1\text{H}$  NMR spectra of the reaction of diphenylacetylene with catalytic amounts of  $[(\eta^5\text{-C}_5\text{H}_5)\text{Co}(\text{Dipp}_2\text{Im})(\eta^2\text{-C}_2\text{H}_3\text{SiMe}_3)]$  **2** (5mol%) in  $\text{C}_6\text{D}_6$  at different temperatures.  $^1\text{H}$  NMR spectra at different temperatures of catalytic investigations of **2** (5mol%) in intermolecular [2+2+2] cycloaddition reaction of diphenylacetylene in  $\text{C}_6\text{D}_6$ . The spectrum at room temperature reveals the resonances detected for  $[(\eta^5\text{-C}_5\text{H}_5)\text{Co}(\text{R}^1_2\text{Im})(\eta^2\text{-C}_2\text{Ph}_2)]$  **4** (violet), the spectra at higher temperatures reveals the resonances detected for  $[(\eta^5\text{-C}_5\text{H}_5)\text{Co}(\eta^4\text{-C}_4\text{Ph}_4)]$  **5** (green), along with uncoordinated  $\text{Dipp}_2\text{Im}$  (yellow).

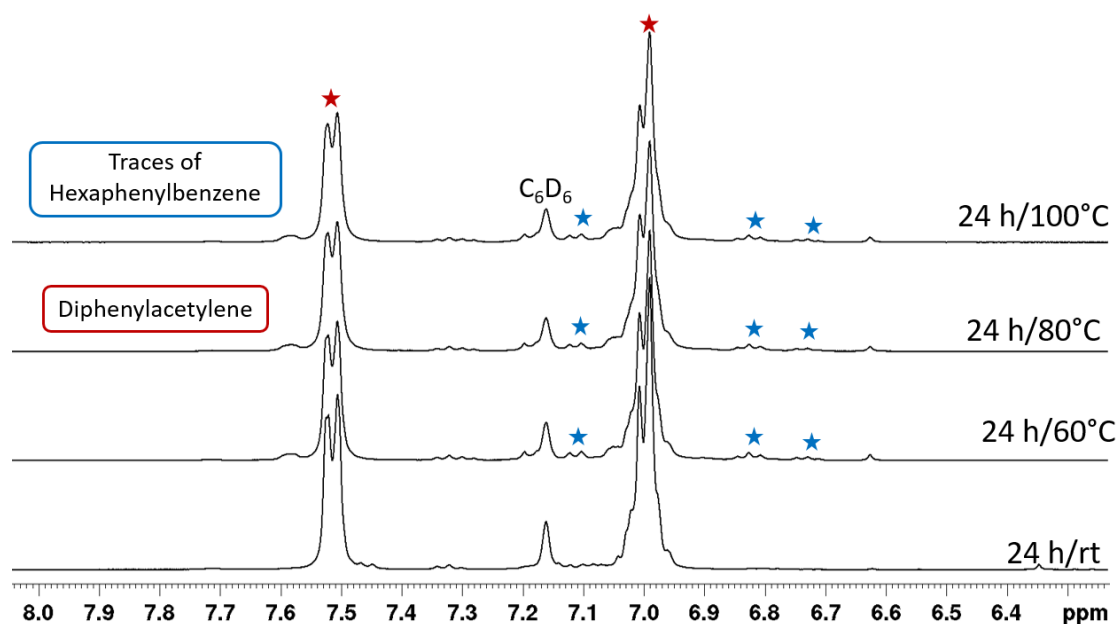

**Figure S35:**  $^1\text{H}$  NMR spectra of the reaction of diphenylacetylene with catalytic amounts of  $[(\eta^5\text{-C}_5\text{H}_5)\text{Co}(\text{Dipp}_2\text{Im})(\eta^2\text{-C}_2\text{H}_3\text{SiMe}_3)]$  **2** (5mol%) in  $\text{C}_6\text{D}_6$  at different temperatures, shown is the aromatic region of the  $^1\text{H}$  NMR spectra. Aside from signals of diphenylacetylene (red) signals for traces of hexaphenylbenzene (blue) at can be detected. Traces of hexaphenylbenzene (534.23) were also found in GC/MS analyses at 16.38 min, beside a major amount of diphenylacetylene (278.2).

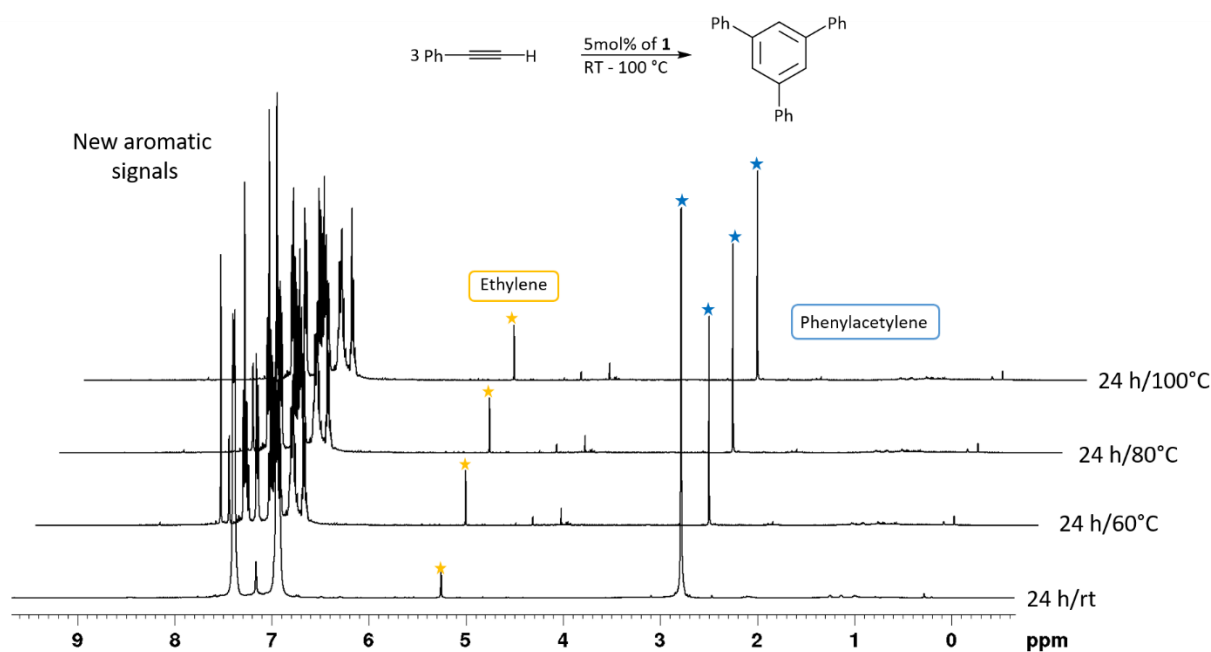

**Figure S36:**  $^1\text{H}$  NMR spectra of the reaction of phenylacetylene with catalytic amounts of  $[(\eta^5\text{-C}_5\text{H}_5)\text{Co}(\text{iPr}_2\text{Im})(\eta^2\text{-C}_2\text{H}_4)]$  **1** (5mol%) in  $\text{C}_6\text{D}_6$  at different temperatures. The spectrum at room temperature reveals a singlet for eliminated ethylene (yellow) and the signals of phenylacetylene (blue). After heating (60 °C), new resonances can be detected in the aromatic region along with resonances for traces of complex **8**.

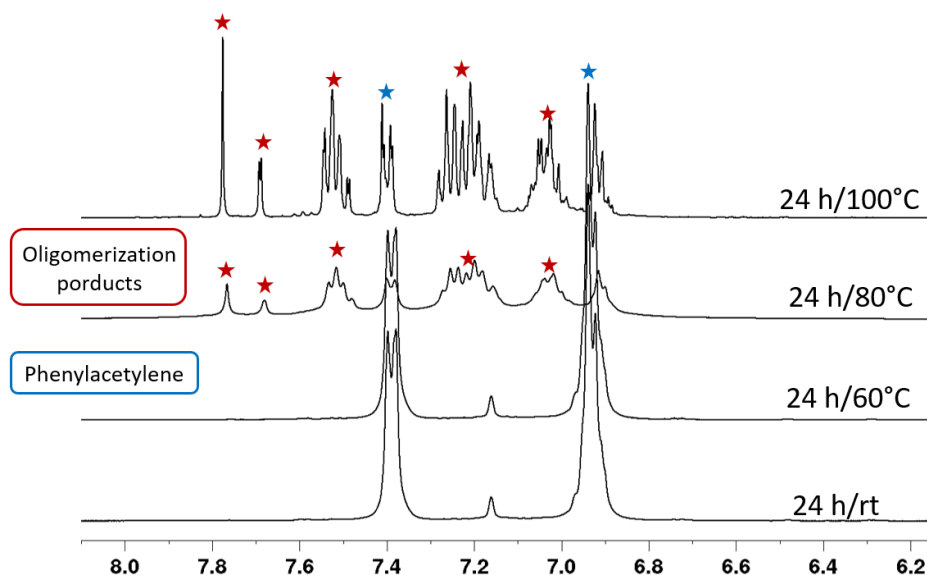

**Figure S37:**  $^1\text{H}$  NMR spectra of the reaction of phenylacetylene with catalytic amounts of  $[(\eta^5\text{-C}_5\text{H}_5)\text{Co}(\text{iPr}_2\text{Im})(\eta^2\text{-C}_2\text{H}_4)]$  **1** (5mol%) in  $\text{C}_6\text{D}_6$  at different temperatures, shown is the aromatic region of the  $^1\text{H}$  NMR spectra. At higher temperatures (80 °C) a set of new aromatic signals for different oligomerization products (red) was detected. GC/MS analyses reveal two different oligomerization products (306.1) at 2.94 min and 13.64 min. But even after prolonged heating (e.g. 100 °C for 24 h) there were still significant amounts of phenylacetylene (blue) detected in the NMR spectra as well as in the GC/MS traces of the reaction.

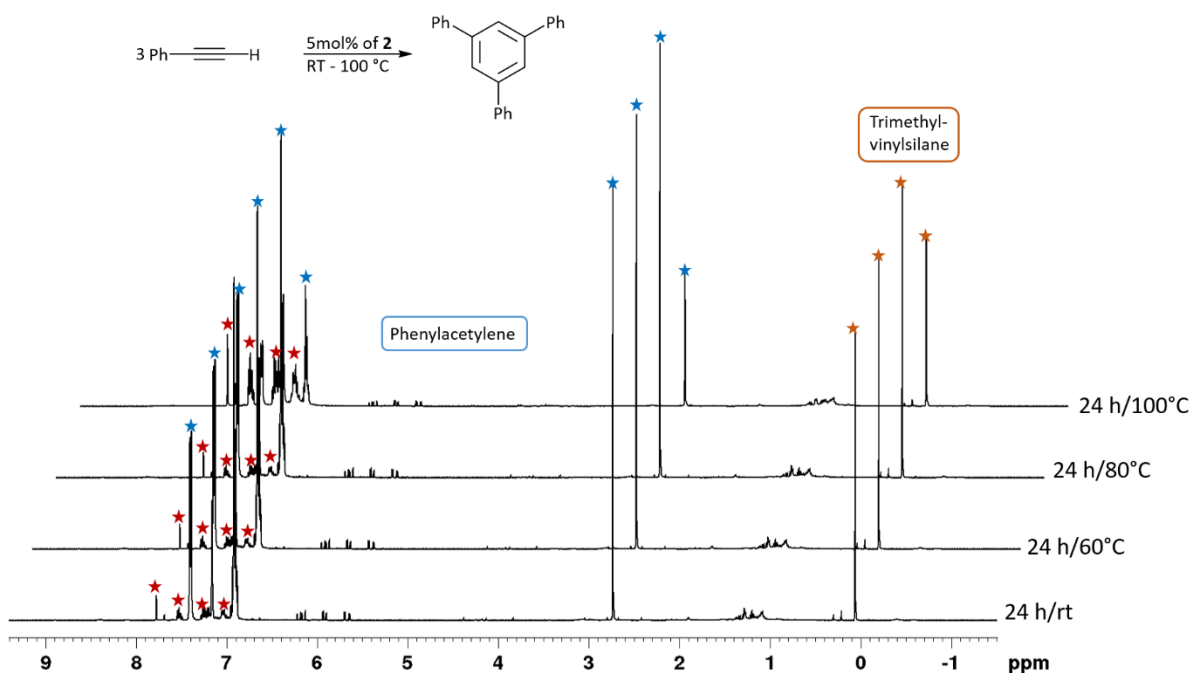

**Figure S38:**  $^1\text{H}$  NMR spectra of the reaction of phenylacetylene with catalytic amounts of  $[(\eta^5\text{-C}_5\text{H}_5)\text{Co}(\text{Dipp}_2\text{Im})(\eta^2\text{-C}_2\text{H}_3\text{SiMe}_3)]$  **2** (5 mol%) in  $\text{C}_6\text{D}_6$  at different temperatures. The spectra reveal the formation of new signals in the aromatic region (red) due to the formation of different [2+2+2] cycloaddition isomers, as well as the signals of phenylacetylene (blue). The resonances of uncoordinated trimethyl vinyl silane (brown) are also detected.

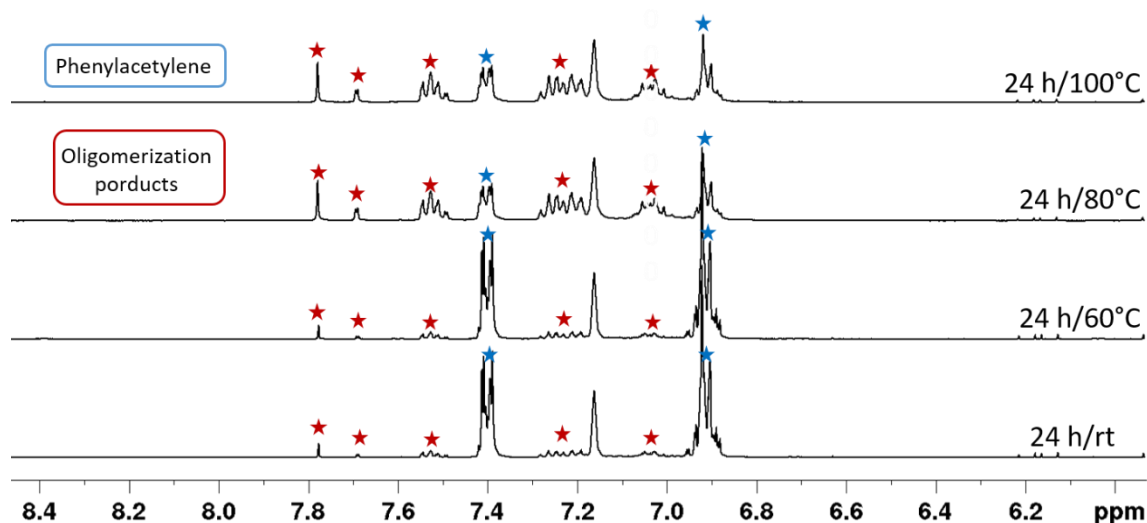

**Figure S39:**  $^1\text{H}$  NMR spectra of the reaction of phenylacetylene with catalytic amounts of  $[(\eta^5\text{-C}_5\text{H}_5)\text{Co}(\text{Dipp}_2\text{Im})(\eta^2\text{-C}_2\text{H}_3\text{SiMe}_3)]$  **2** (5 mol%) in  $\text{C}_6\text{D}_6$  at different temperatures, shown is the aromatic region of the  $^1\text{H}$  NMR spectra. The spectra reveal the formation of new signals in the aromatic region (red) due to the formation of different [2+2+2] cycloaddition isomers, as well as the signals of phenylacetylene (blue). According to GC/MS analysis are two different oligomerization products (306.1) at 2.94 min and 13.64 min formed. But even after prolonged heating (e.g. 100 °C for 24 h) there were still significant amounts of phenylacetylene (blue) detected in the NMR spectra as well as in the GC/MS traces of the reaction.

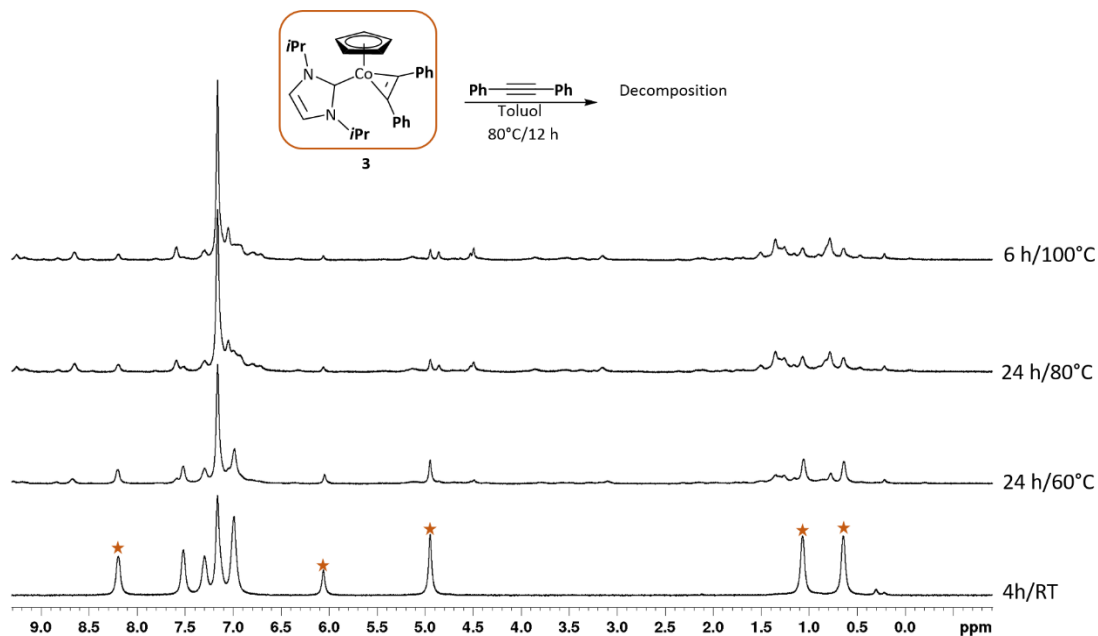

**Figure S40:**  $^1\text{H}$  NMR spectra at different temperatures of the reaction of  $[(\eta^5\text{-C}_5\text{H}_5)\text{Co}(\text{iPr}_2\text{Im})(\eta^2\text{-C}_2\text{Ph}_2)]$  **3** with additional of diphenylacetylene in  $\text{C}_6\text{D}_6$ . There is no reaction at room temperature and the spectrum reveals the resonances of **3** (brown) and diphenylacetylene. Applying higher temperatures leads to decomposition of **3**.

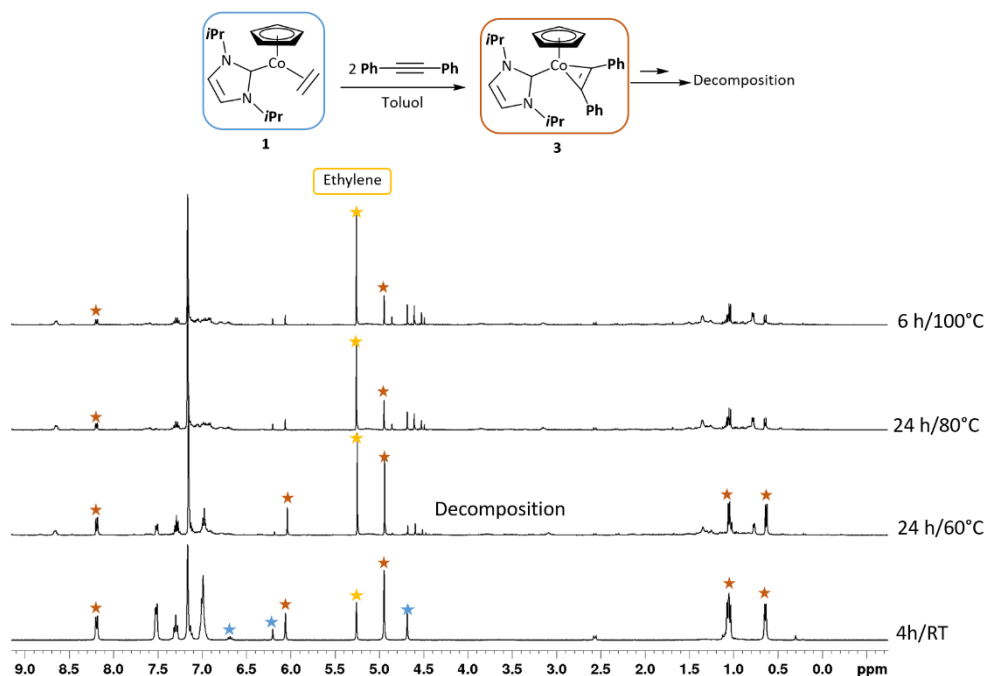

**Figure S41:**  $^1\text{H}$  NMR spectra at different temperatures of the reaction of  $[(\eta^5\text{-C}_5\text{H}_5)\text{Co}(\text{iPr}_2\text{Im})(\eta^2\text{-C}_2\text{H}_4)]$  **1** with two equivalents of diphenylacetylene in  $\text{C}_6\text{D}_6$ . The NMR spectrum at room temperature reveals resonances for the complexes  $[(\eta^5\text{-C}_5\text{H}_5)\text{Co}(\text{iPr}_2\text{Im})(\eta^2\text{-C}_2\text{H}_4)]$  **1** (blue) and  $[(\eta^5\text{-C}_5\text{H}_5)\text{Co}(\text{iPr}_2\text{Im})(\eta^2\text{-C}_2\text{Ph}_2)]$  **3** (brown) and diphenylacetylene. At elevated temperatures the decomposition of **3** can be observed.

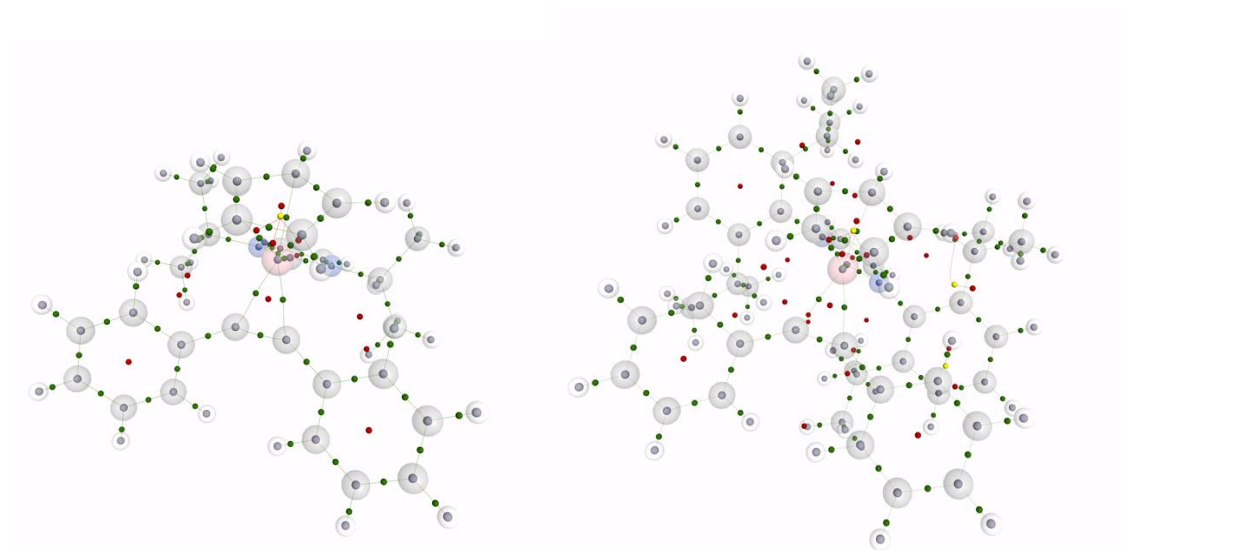

**Figure S42:** Bond critical (green) and ring critical (red) points calculated for  $[(\eta^5\text{-C}_5\text{H}_5)\text{Co}(\text{iPr}_2\text{Im})(\eta^2\text{-C}_2\text{Ph}_2)]$  (left) and  $[(\eta^5\text{-C}_5\text{H}_5)\text{Co}(\text{Dipp}_2\text{Im})(\eta^2\text{-C}_2\text{Ph}_2)]$  (right).

## Computational details – Optimized

### $[(\eta^5\text{-C}_5\text{H}_5)\text{Co}(\text{iPr}_2\text{Im})(\eta^2\text{-C}_2\text{Ph}_2)]$

Energy = -2578.65598425711

NIMAG = 0

|    |           |            |            |
|----|-----------|------------|------------|
| Co | 6.9825518 | 8.1960871  | 1.5512654  |
| C  | 8.7282989 | 7.4622564  | 1.4869162  |
| C  | 6.1412695 | 6.5600680  | 2.2081993  |
| C  | 6.1437588 | 6.5499681  | 0.9088950  |
| C  | 5.5140474 | 9.6241266  | 0.8887286  |
| C  | 5.5493776 | 9.5981091  | 2.3176990  |
| C  | 6.8605135 | 9.9550978  | 2.7463188  |
| C  | 7.6424634 | 10.1671836 | 1.5614807  |
| C  | 6.8031085 | 9.9932486  | 0.4096036  |
| N  | 9.5441070 | 7.1045306  | 2.5371112  |
| N  | 9.5005461 | 7.1963326  | 0.3775025  |
| C  | 5.6439224 | 5.9656133  | 3.4221447  |
| C  | 5.7249779 | 5.9180042  | -0.3132961 |
| H  | 4.6460839 | 9.3862499  | 0.2801785  |
| H  | 4.7131385 | 9.3371543  | 2.9600865  |
| H  | 7.1972035 | 10.0838101 | 3.7708221  |

## Geometries

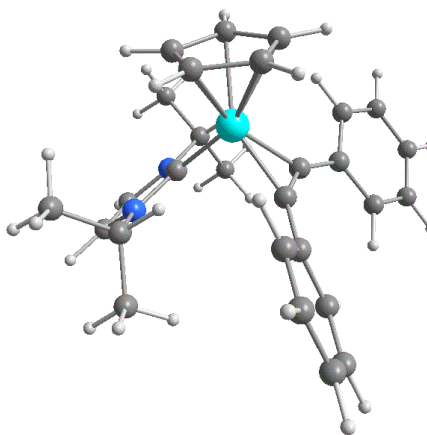

|   |            |            |            |
|---|------------|------------|------------|
| H | 8.6901007  | 10.4577993 | 1.5413268  |
| H | 7.0892272  | 10.1556012 | -0.6254511 |
| C | 10.7739699 | 6.6426234  | 2.0906923  |
| C | 9.1761829  | 7.2086012  | 3.9606851  |
| C | 10.7467576 | 6.7009578  | 0.7333800  |
| C | 9.0776366  | 7.4227123  | -1.0167362 |
| C | 5.1966960  | 4.6210090  | 3.4564089  |
| C | 5.5693787  | 6.7037389  | 4.6259926  |
| C | 5.4536535  | 6.6747084  | -1.4774352 |
| C | 5.5743571  | 4.5114581  | -0.4026563 |
| H | 11.5547035 | 6.3071751  | 2.7616921  |
| H | 8.1308325  | 7.5473280  | 3.9289424  |
| C | 9.2446988  | 5.8427987  | 4.6462735  |
| C | 10.0316378 | 8.2640805  | 4.6675765  |
| H | 11.4995990 | 6.4257916  | 0.0055287  |
| H | 8.0245465  | 7.7236714  | -0.9191930 |
| C | 9.1622331  | 6.1319899  | -1.8333703 |
| C | 9.8774496  | 8.5670299  | -1.6469852 |
| H | 5.2393770  | 4.0263129  | 2.5440594  |
| C | 4.6998637  | 4.0557516  | 4.6279202  |
| C | 5.0661887  | 6.1363324  | 5.7954807  |
| H | 5.9048162  | 7.7416459  | 4.6171927  |
| H | 5.5756499  | 7.7576302  | -1.4306350 |
| C | 5.0250899  | 6.0643274  | -2.6542803 |
| C | 5.1584723  | 3.9040456  | -1.5853527 |
| H | 5.8053611  | 3.8992331  | 0.4694792  |
| H | 8.6168844  | 5.1105594  | 4.1229893  |
| H | 8.8781015  | 5.9275356  | 5.6780911  |
| H | 10.2753164 | 5.4585433  | 4.6871588  |
| H | 9.9566928  | 9.2364065  | 4.1624489  |
| H | 11.0924503 | 7.9727039  | 4.6976120  |
| H | 9.6906513  | 8.3869782  | 5.7049768  |
| H | 8.5779913  | 5.3308312  | -1.3632306 |
| H | 10.2018702 | 5.7898657  | -1.9497366 |
| H | 8.7534099  | 6.3036746  | -2.8381433 |



|   |            |           |            |
|---|------------|-----------|------------|
| H | 9.7916921  | 9.4849427 | -1.0502892 |
| H | 9.4990545  | 8.7756160 | -2.6574074 |
| H | 10.9445518 | 8.3129127 | -1.7358132 |
| H | 4.3612205  | 3.0178929 | 4.6226794  |
| C | 4.6302748  | 4.8075750 | 5.8070765  |
| H | 5.0120559  | 6.7356233 | 6.7064807  |
| H | 4.8077020  | 6.6769046 | -3.5314679 |
| C | 4.8751494  | 4.6746382 | -2.7188699 |
| H | 5.0533232  | 2.8180815 | -1.6242036 |
| H | 4.2410836  | 4.3616175 | 6.7233007  |
| H | 4.5463259  | 4.1967930 | -3.6425939 |

**$[(\eta^5\text{-C}_5\text{H}_5)\text{Co}(\text{Dipp}_2\text{Im})(\eta^2\text{-C}_2\text{Ph}_2)]$**

Energy = -3276.858758454

NIMAG = 0

|    |            |            |            |
|----|------------|------------|------------|
| Co | 6.9053609  | 8.0107351  | 1.3919782  |
| C  | 8.7488609  | 7.5338085  | 1.3900549  |
| C  | 6.1272595  | 6.5326952  | 2.4032053  |
| C  | 6.0954820  | 6.2417959  | 1.1362091  |
| C  | 5.2982549  | 9.1084122  | 0.4437921  |
| C  | 5.2674471  | 9.3182131  | 1.8583680  |
| C  | 6.4946213  | 9.9180391  | 2.2549541  |
| C  | 7.2999324  | 10.0286262 | 1.0771421  |
| C  | 6.5491904  | 9.5550196  | -0.0553789 |
| N  | 9.5815409  | 7.2657419  | 2.4736282  |
| N  | 9.6601391  | 7.5927504  | 0.3308510  |
| C  | 5.5031974  | 6.2912111  | 3.6831247  |
| C  | 5.5106775  | 5.4230368  | 0.1079572  |
| H  | 4.4985208  | 8.6578596  | -0.1362501 |
| H  | 4.4502361  | 9.0418453  | 2.5183563  |
| H  | 6.7588751  | 10.2543531 | 3.2508451  |
| H  | 8.2966449  | 10.4571136 | 1.0427820  |
| H  | 6.8734084  | 9.5496974  | -1.0908299 |
| C  | 10.9213142 | 7.1984275  | 2.0983340  |
| C  | 10.9703837 | 7.4086545  | 0.7637548  |

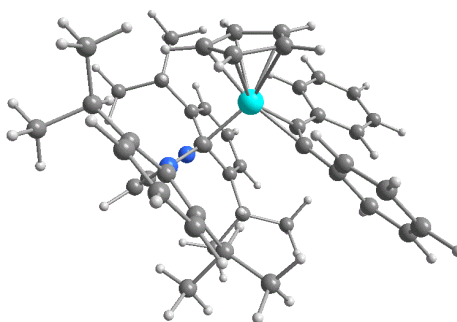

|   |            |           |            |
|---|------------|-----------|------------|
| C | 4.6336824  | 5.1888127 | 3.8774865  |
| C | 5.6832308  | 7.1761613 | 4.7673885  |
| C | 5.1952705  | 5.9544559 | -1.1643473 |
| C | 5.1781469  | 4.0655983 | 0.3463365  |
| H | 11.7057766 | 6.9996633 | 2.8165549  |
| H | 11.8082051 | 7.4309708 | 0.0796735  |
| H | 4.4583924  | 4.4990533 | 3.0517068  |
| C | 3.9801143  | 4.9926475 | 5.0914191  |
| C | 5.0283990  | 6.9762765 | 5.9816486  |
| H | 6.3526639  | 8.0249429 | 4.6306899  |
| H | 5.4892947  | 6.9802288 | -1.3840877 |
| C | 4.5234333  | 5.1930009 | -2.1192345 |
| C | 4.5263836  | 3.3022303 | -0.6193719 |
| H | 5.4474008  | 3.6156424 | 1.3025928  |
| H | 3.3084485  | 4.1400410 | 5.2093189  |
| C | 4.1734530  | 5.8836415 | 6.1541081  |
| H | 5.1873163  | 7.6786459 | 6.8020841  |
| H | 4.2751859  | 5.6381229 | -3.0847424 |
| C | 4.1804947  | 3.8626871 | -1.8547839 |
| H | 4.2811462  | 2.2599791 | -0.4058710 |
| H | 3.6609851  | 5.7272244 | 7.1044485  |
| H | 3.6610801  | 3.2657323 | -2.6054830 |
| C | 9.2460476  | 7.0147106 | 3.8606693  |
| C | 9.2988679  | 8.0833832 | 4.7832696  |
| C | 9.0569626  | 5.6761702 | 4.2716203  |
| C | 9.1257187  | 7.7801223 | 6.1406969  |
| C | 8.8837649  | 5.4345387 | 5.6411274  |
| C | 8.9178733  | 6.4714031 | 6.5682866  |
| H | 9.1559781  | 8.5845920 | 6.8761502  |
| H | 8.7208467  | 4.4131084 | 5.9855568  |
| H | 8.7808695  | 6.2590972 | 7.6296931  |
| C | 9.3877530  | 7.7234674 | -1.0864265 |
| C | 9.0330069  | 6.5646174 | -1.8217473 |
| C | 9.6267168  | 8.9642247 | -1.7202206 |
| C | 8.7900579  | 6.7193870 | -3.1928650 |

|   |            |            |            |
|---|------------|------------|------------|
| C | 9.3788390  | 9.0539418  | -3.0982048 |
| C | 8.9401892  | 7.9524031  | -3.8246063 |
| H | 8.4877951  | 5.8529989  | -3.7796169 |
| H | 9.5395708  | 10.0045489 | -3.6081801 |
| H | 8.7398195  | 8.0460713  | -4.8932345 |
| C | 9.5878202  | 9.5183060  | 4.3566756  |
| H | 9.2947285  | 9.6094779  | 3.3003818  |
| C | 8.7845841  | 10.5570020 | 5.1579083  |
| H | 8.8842902  | 11.5493363 | 4.6952718  |
| H | 7.7162021  | 10.3063657 | 5.2042347  |
| H | 9.1508147  | 10.6449345 | 6.1914692  |
| C | 11.0925427 | 9.8412957  | 4.4655482  |
| H | 11.2858721 | 10.8788558 | 4.1543050  |
| H | 11.4377246 | 9.7295526  | 5.5044377  |
| H | 11.7010527 | 9.1820310  | 3.8331967  |
| C | 9.1063982  | 4.5052158  | 3.2965704  |
| H | 8.9051994  | 4.9020015  | 2.2909597  |
| C | 10.5089626 | 3.8620957  | 3.2905176  |
| H | 10.5443164 | 3.0273128  | 2.5749405  |
| H | 11.2910463 | 4.5798004  | 3.0093093  |
| H | 10.7564823 | 3.4644848  | 4.2865250  |
| C | 8.0443942  | 3.4328202  | 3.5857941  |
| H | 8.0352506  | 2.6916194  | 2.7736083  |
| H | 8.2566632  | 2.8878251  | 4.5176767  |
| H | 7.0418434  | 3.8708240  | 3.6682011  |
| C | 9.0138914  | 5.1721617  | -1.1953937 |
| H | 8.5912715  | 5.2694511  | -0.1829736 |
| C | 8.1639354  | 4.1508372  | -1.9633741 |
| H | 8.6275524  | 3.8830274  | -2.9254676 |
| H | 8.0866771  | 3.2255487  | -1.3761601 |
| H | 7.1466741  | 4.5118633  | -2.1536797 |
| C | 10.4499733 | 4.6128808  | -1.0765006 |
| H | 10.9117247 | 4.5346646  | -2.0725783 |
| H | 11.0971717 | 5.2341190  | -0.4464312 |
| H | 10.4243429 | 3.6046100  | -0.6376083 |

|   |            |            |            |
|---|------------|------------|------------|
| C | 10.2272737 | 10.1672102 | -0.9989970 |
| H | 10.1428694 | 9.9886815  | 0.0828055  |
| C | 11.7294970 | 10.2936039 | -1.3309612 |
| H | 11.8751788 | 10.4778552 | -2.4056758 |
| H | 12.1755695 | 11.1342415 | -0.7791204 |
| H | 12.2875676 | 9.3839015  | -1.0715596 |
| C | 9.5173603  | 11.4938282 | -1.3206561 |
| H | 8.4366309  | 11.4399431 | -1.1387896 |
| H | 9.9282297  | 12.3005199 | -0.6960808 |
| H | 9.6699912  | 11.7888129 | -2.3690104 |
